# Supplementary material
Source: PubMed Central journal article supplement (PMC5330676)
Supplement: NIHMS846235-supplement-Supporting_Information.pdf [file NIHMS846235-supplement-Supporting_Information.pdf]

## Table of Contents

|                                                                                 |    |
|---------------------------------------------------------------------------------|----|
| <b>Supporting Methods</b> .....                                                 | 2  |
| General Information .....                                                       | 2  |
| DNA sequences .....                                                             | 2  |
| <b>Templates</b> .....                                                          | 2  |
| <b>Primers</b> .....                                                            | 2  |
| <b>Pentanucleotides</b> .....                                                   | 2  |
| Synthesis of amino-modified pentanucleotides .....                              | 3  |
| Functionalization of amino-modified pentanucleotides with carboxylic acids..... | 3  |
| T4-DNA Ligase-mediate adapter ligation protocols .....                          | 3  |
| <b>T4-DNA Ligase-mediate polymerization</b> .....                               | 3  |
| <b>Adapter duplex synthesis</b> .....                                           | 4  |
| <b>Adapter ligation</b> .....                                                   | 4  |
| <b>PCR protocols</b> .....                                                      | 4  |
| <b>High-Throughput DNA sequencing Protocol</b> .....                            | 5  |
| <b>Supporting Tables</b> .....                                                  | 6  |
| <b>Supporting Figures</b> .....                                                 | 13 |

## **Supporting Methods**

### **General Information**

Unless otherwise noted, water was purified with ELGA Flex 3 purification system. DNA oligonucleotides without amine modification were purchased from Integrated DNA Technologies. DNA oligonucleotides with amine modification were synthesized on a Bioautomation Mermade 12 synthesizer. All materials and reagents used for oligonucleotide synthesis were purchased from Glen Research. All oligonucleotides were synthesized and deprotected according to the manufacturer's protocols. Oligonucleotides were purified by reverse-phase high-pressure liquid chromatography (HPLC, Agilent 1260) using a C18 stationary phase (Eclipse-XDB C18, 5  $\mu$ m, 9.4 x 200 mm) and an acetonitrile/100 mM triethylammonium acetate gradient. Oligonucleotide concentrations were quantitated by UV spectroscopy using a Nanodrop ND2000 spectrophotometer.

### **DNA sequences**

The sequences below are written from 5'  $\rightarrow$  3'. <Aam> = Amino-modifier C6 dA, <N>=A/T/C/G

### **Templates**

**TP(NNNNT)8P** /5Phos/GA TTC GCC TGC CGT CGC ANN NNT NNN NTN NNN TNN NNT NNN NTN  
NNN TNN NNT NNN NTC ACG TGG AGC TCG GAT CCT

### **Primers**

**PR5** /5Phos/GG ATC CGA GCT CCA CGT G

**PR6** /5Phos/TG CGA CGG CAG GCG AAT CT

**iTruS\_i7\_D701** CAA GCA GAA GAC GGC ATA CGA GAT ATT ACT CGG TGA CTG GAG TTC AG  
**iTruS\_i7\_D702** CAA GCA GAA GAC GGC ATA CGA GAT TCC GGA GAG TGA CTG GAG TTC AG  
**iTruS\_i7\_D703** CAA GCA GAA GAC GGC ATA CGA GAT CGC TCA TTG TGA CTG GAG TTC AG  
**iTruS\_i7\_D704** CAA GCA GAA GAC GGC ATA CGA GAT GAG ATT CCG TGA CTG GAG TTC AG  
**iTruS\_i7\_D705** CAA GCA GAA GAC GGC ATA CGA GAT ATT CAG AAG TGA CTG GAG TTC AG  
**iTruS\_i7\_D706** CAA GCA GAA GAC GGC ATA CGA GAT GAA TTC GTG TGA CTG GAG TTC AG  
**iTruS\_i7\_D707** CAA GCA GAA GAC GGC ATA CGA GAT CTG AAG CTG TGA CTG GAG TTC AG  
**iTruS\_i7\_D708** CAA GCA GAA GAC GGC ATA CGA GAT TAA TGC GCG TGA CTG GAG TTC AG  
**iTruS\_i7\_D709** CAA GCA GAA GAC GGC ATA CGA GAT CGG CTA TGG TGA CTG GAG TTC AG  
**iTruS\_i7\_D710** CAA GCA GAA GAC GGC ATA CGA GAT TCC GCG AAG TGA CTG GAG TTC AG  
**iTruS\_i7\_D711** CAA GCA GAA GAC GGC ATA CGA GAT TCT CGC GCG TGA CTG GAG TTC AG  
**iTruS\_i7\_D712** CAA GCA GAA GAC GGC ATA CGA GAT AGC GAT AGG TGA CTG GAG TTC AG  
**PRIMER B** AAT GAT ACG GCG ACC ACC GAG

### **Pentanucleotides**

**ANNNN** /5Phos/ANNNN

**NH2-ANNNN**/5Phos/<Ama>NNNN

## Synthesis of amino-modified pentanucleotides

Pentanucleotides were synthesized on a Mermaid 12 DNA synthesizer using a DMT-ON protocol on a 1  $\mu\text{mol}$  scale (1000 Å CPG column). Amine-modifier C6 dA (Glen Research 10-1089), dA+dC+dG+dT-CE Phosphoramidite (Glen Research 10-1000, 10-1010, 10-1020, 10-1030), Chemical Phosphorylation Reagent II (10-1901) were incorporated as specified by the manufacturer. Following synthesis, the oligonucleotide was cleaved from the resin by incubation at 25°C in 400  $\mu\text{L}$  of a 1:1 mixture of ammonium hydroxide and methylamine for 25 minutes. The cleaved resin was filtered away by filtration, followed by incubation at 60°C for 30 minutes to remove the protecting groups on phosphoramidites. The oligonucleotide was concentrated under reduced pressure using a speedvac. The residue was then taken up into 100  $\mu\text{L}$  of  $\text{H}_2\text{O}$ , and purified using reverse-phase HPLC purification using a [10% acetonitrile in 0.1 M TEAA, pH7] to [80% acetonitrile in 0.1 M TEAA, pH7] solvent gradient with a column temperature of 45°C. The purified oligonucleotide was then incubated at room temperature in 1mL of 40% aqueous acetic acid for 1 h to cleave the DMT group, and then frozen and lyophilized. The oligonucleotide was incubated in 500  $\mu\text{L}$  30% ammonium hydroxide at room temperature for 15 minutes to cleave the CPRII linker. Following deprotection, the oligonucleotide was concentrated under reduced pressure using a speedvac. The dried product was dissolved into 100  $\mu\text{L}$   $\text{H}_2\text{O}$  and subjected to reverse-phase HPLC purification using a [10% acetonitrile in 0.1M TEAA, pH 7] to [80% acetonitrile in 0.1M TEAA, pH 7] solvent gradient with a column temperature of 45°C. The purified oligonucleotide was dissolved in water.

## Functionalization of amino-modified pentanucleotides with carboxylic acids

A mixture of 25  $\mu\text{L}$  carboxylic acid (100 mM in DMSO), 25  $\mu\text{L}$  N-Hydroxysuccinimide (NHS, 100 mM in 1:1 mixture of DMSO and  $\text{H}_2\text{O}$ ), 5  $\mu\text{L}$  1-Ethyl-3-(3-dimethylaminopropyl)carbodiimide (EDC, 100 mM in DMSO) and 7.5  $\mu\text{L}$  DMSO was incubated at room temperature for 30 minutes. Followed by addition 7.5  $\mu\text{L}$  of amino modified pentanucleotides (10nmol in  $\text{H}_2\text{O}$ ) and 30  $\mu\text{L}$   $\text{Na}_2\text{CO}_3$  buffer (500 mM in  $\text{H}_2\text{O}$ , pH 9). The mixture was incubated at room temperature overnight with vortex. The reaction was then quenched by addition of 15  $\mu\text{L}$  Tris buffer (500 mM in  $\text{H}_2\text{O}$ ) at room temperature for one hour and functionalized pentanucleotide was then purified with HPLC purification using a [10% acetonitrile in 0.1M TEAA, pH 7] to [80% acetonitrile in 0.1M TEAA, pH 7] solvent gradient with a column temperature of 45°C. The purified pentanucleotide was dissolved in water and characterized with mass spectrometry.

## T4-DNA Ligase-mediate adapter ligation protocols

### T4-DNA Ligase-mediate polymerization

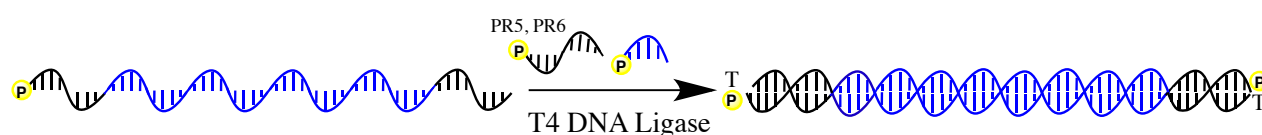

In a PCR tube was added 1.5  $\mu\text{L}$  DNA template (10  $\mu\text{M}$  in  $\text{H}_2\text{O}$ ), 2.25  $\mu\text{L}$  PR5 (10  $\mu\text{M}$  in  $\text{H}_2\text{O}$ ), 2.25  $\mu\text{L}$  PR6 (10  $\mu\text{M}$  in  $\text{H}_2\text{O}$ ), 5 $\mu\text{L}$  ligation reaction buffer 4X (40 mM  $\text{MgCl}_2$ , 24% w/v PEG6000, 40mM DTT, 264mM Tris pH 7.6), 2  $\mu\text{L}$  ATP (0.25 mM in  $\text{H}_2\text{O}$ ) and 4  $\mu\text{L}$   $\text{H}_2\text{O}$ . The mix was heated

to 90 °C for 2 minutes and then cooled to 25 °C at the rate of 0.1 °C/s. In this PCR tube was then added 1 µL pentanucleotides (480 µM in H<sub>2</sub>O), 1 µL BSA (2 mg/mL in H<sub>2</sub>O) and 400 U T4 DNA ligase (New England Biolabs, M0202L). The polymerization was performed at 25 °C for 24 hours. The products were then purified with MinElute® PCR Purification Kit for adapter ligation.

### Adapter duplex synthesis

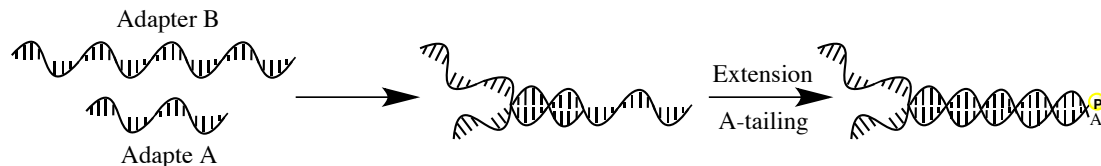

In a PCR tube was added 15 µL of 100 µM adapterA and 15 µL of 100 µM adapterB, then the tube was heated to 95 °C for 5 minutes, and cooled to room temperature over one hour. Then in this PCR tube was added 4 µL NEBuffer2 10× (New England Biolabs, M0212L), 25 U Klenow Fragment (3'→5' exo<sup>-</sup>, New England Biolabs, M0212L), 1 µL dNTP Mix (Thermo Scientific, 10 mM each). The extension was performed at 37 °C for 1 hour. The adapter duplex was purified with QIAquick Nucleotide Removal Kit, and then diluted in 30 µL water.

In a PCR tube was added 30 µl purified adapter duplex, 5 µl NEBuffer2 10× (New England Biolabs, M0212L), 25 U Klenow Fragment (3'→5' exo<sup>-</sup>, New England Biolabs, M0212L), 5 µl dATP (Thermo Scientific, 10 mM), 5 µL H<sub>2</sub>O. This PCR tube was incubated at 37 °C for 1 hour for A-tailing. Then product was purified with QIAquick Nucleotide Removal Kit, and then diluted in 30 µL water.

### Adapter ligation

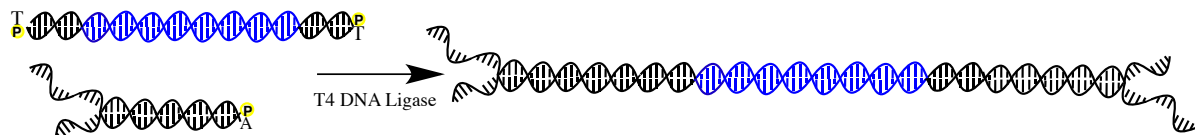

In a PCR tube was added 10pmol polymerization products, 200 pmol A-tailing adapter duplex, 10 µL NEBNext® Quick Ligation Reaction Buffer 5×, 2.5µL BSA (2mg/mL in H<sub>2</sub>O), 1000U T4 DNA ligase (New England Biolabs, M0202L), the total volume of reaction was adjusted to 50 µL with H<sub>2</sub>O. Then the ligation was performed at 16 °C for 16 hours. The ligated products were then gel purified.

### PCR protocols

Each purified adapter ligation product was amplified with a different primer from iTrus\_D701 to iTrus\_D712.

In a PCR tube was added 50 attomole purified adapter ligation product in 10 µL H<sub>2</sub>O, 1.25µL 10 µM Primer B, 1.25 µL 10 µM corresponding iTrus\_D7XX primer, and 12.5 µL Q5® High-Fidelity 2× Master Mix (New England Biolabs). The tube was then transferred to a preheated thermocycler (98°C). The PCR cycle was 10 s of 98°C denature step, 30 s of primer annealing step (annealing temperature was 55°C for the first two cycles, and 71 °C for the rest of the cycles), and 30 s of 72°C extension step. The PCR products were then gel purified.

**High-Throughput DNA sequencing Protocol**

The concentrations of gel purified samples were determined with Kapa library quantification kit for Illumina libraries (KK4845) on Roche LightCycler 480. Paired-end Illumina sequencing was performed on an Illumina MiSeq system using the kit v2 with 300 cycles (150bp PE sequencing) at the Georgia Genomics Facility, University of Georgia, Athens, GA, USA

## **Supporting Tables**

**Table S1.** Temperature influence on LOOPER with phenyl-monomodified ANNNN library

| Entry | Temperature | Yield | Bias | Fidelity |
|-------|-------------|-------|------|----------|
| 1     | 10 °C       | 62%   | 0.37 | 94.91%   |
| 2     | 15 °C       | 61%   | 0.32 | 93.80%   |
| 3     | 20 °C       | 63%   | 0.30 | 94.49%   |
| 4     | 25 °C       | 63%   | 0.29 | 94.06%   |
| 5     | 30 °C       | 63%   | 0.41 | 93.94%   |

**Table S2.** ATP influence on LOOPER with phenyl-monomodified ANNNN library

| Entry | ATP     | Yield | Bias | Fidelity |
|-------|---------|-------|------|----------|
| 1     | 1000 uM | 63%   | 0.35 | 95.28%   |
| 2     | 150 uM  | 69%   | 0.31 | 95.19%   |
| 3     | 25 uM   | 62%   | 0.29 | 94.06%   |

**Table S3.** Enrichments and Fidelities of the 256 pentanucleotides in the heterofunctionalized library (16 different modifications for each sub-library are shown in Table 2).

| Entry | Pentanucleotide | Enrichment | Fidelity |
|-------|-----------------|------------|----------|
| 1     | AAAAA           | 39.04%     | 94.67%   |
| 2     | AAAAC           | 47.70%     | 79.20%   |
| 3     | AAAAG           | 58.59%     | 93.94%   |
| 4     | AAAAT           | 46.78%     | 89.78%   |
| 5     | AAACA           | 76.27%     | 91.84%   |
| 6     | AAACC           | 121.97%    | 96.43%   |
| 7     | AAACG           | 81.17%     | 93.62%   |
| 8     | AAACT           | 47.87%     | 95.79%   |
| 9     | AAAGA           | 66.24%     | 92.00%   |
| 10    | AAAGC           | 122.36%    | 97.14%   |
| 11    | AAAGG           | 94.83%     | 98.43%   |
| 12    | AAAGT           | 80.20%     | 89.84%   |
| 13    | AAATA           | 40.28%     | 86.61%   |
| 14    | AAATC           | 78.12%     | 93.84%   |
| 15    | AAATG           | 95.43%     | 96.69%   |
| 16    | AAATT           | 43.82%     | 90.72%   |
| 17    | AACAA           | 96.27%     | 93.26%   |
| 18    | AACAC           | 106.96%    | 86.39%   |
| 19    | AACAG           | 106.93%    | 95.71%   |
| 20    | AACAT           | 105.75%    | 92.65%   |
| 21    | AACCA           | 96.43%     | 95.51%   |
| 22    | AACCC           | 156.66%    | 97.00%   |
| 23    | AACCG           | 123.99%    | 96.00%   |
| 24    | AACCT           | 84.76%     | 92.44%   |
| 25    | AACGA           | 116.04%    | 93.14%   |

|    |       |         |        |
|----|-------|---------|--------|
| 26 | AACGC | 211.19% | 95.29% |
| 27 | AACGG | 151.85% | 96.82% |
| 28 | AACGT | 123.96% | 95.00% |
| 29 | AACTA | 72.60%  | 88.06% |
| 30 | AACTC | 96.80%  | 93.22% |
| 31 | AACTG | 172.32% | 99.12% |
| 32 | AACTT | 82.57%  | 92.68% |
| 33 | AAGAA | 50.75%  | 93.52% |
| 34 | AAGAC | 67.32%  | 84.40% |
| 35 | AAGAG | 83.53%  | 94.74% |
| 36 | AAGAT | 57.84%  | 90.72% |
| 37 | AAGCA | 76.56%  | 94.12% |
| 38 | AAGCC | 112.26% | 95.74% |
| 39 | AAGCG | 108.84% | 95.33% |
| 40 | AAGCT | 32.89%  | 90.24% |
| 41 | AAGGA | 89.39%  | 92.24% |
| 42 | AAGGC | 156.03% | 96.82% |
| 43 | AAGGG | 114.15% | 94.68% |
| 44 | AAGGT | 79.64%  | 94.05% |
| 45 | AAGTA | 44.30%  | 89.87% |
| 46 | AAGTC | 71.90%  | 78.95% |
| 47 | AAGTG | 119.14% | 95.45% |
| 48 | AAGTT | 54.60%  | 89.04% |
| 49 | AATAA | 62.85%  | 91.58% |
| 50 | AATAC | 79.17%  | 75.00% |
| 51 | AATAG | 88.27%  | 88.44% |
| 52 | AATAT | 46.50%  | 87.13% |
| 53 | AATCA | 87.01%  | 93.79% |
| 54 | AATCC | 133.46% | 95.71% |
| 55 | AATCG | 92.39%  | 98.11% |
| 56 | AATCT | 54.22%  | 95.95% |
| 57 | AATGA | 99.18%  | 96.13% |
| 58 | AATGC | 153.84% | 96.30% |
| 59 | AATGG | 150.11% | 98.00% |
| 60 | AATGT | 92.64%  | 88.33% |
| 61 | AATTA | 61.26%  | 91.49% |
| 62 | AATTC | 66.07%  | 95.65% |
| 63 | AATTG | 117.72% | 97.62% |
| 64 | AATTT | 46.71%  | 87.80% |
| 65 | ACAAA | 73.71%  | 96.63% |
| 66 | ACAAC | 93.81%  | 83.85% |
| 67 | ACAAG | 94.36%  | 95.42% |
| 68 | ACAAT | 97.91%  | 93.82% |
| 69 | ACACA | 123.44% | 92.89% |
| 70 | ACACC | 170.27% | 94.65% |
| 71 | ACACG | 154.28% | 97.33% |

|     |       |         |        |
|-----|-------|---------|--------|
| 72  | ACACT | 79.68%  | 95.37% |
| 73  | ACAGA | 106.63% | 95.76% |
| 74  | ACAGC | 176.16% | 98.07% |
| 75  | ACAGG | 139.21% | 95.07% |
| 76  | ACAGT | 108.74% | 95.12% |
| 77  | ACATA | 94.14%  | 89.39% |
| 78  | ACATC | 92.70%  | 87.07% |
| 79  | ACATG | 154.97% | 95.38% |
| 80  | ACATT | 84.18%  | 88.80% |
| 81  | ACCAA | 118.57% | 96.51% |
| 82  | ACCAC | 130.02% | 89.00% |
| 83  | ACCAG | 149.36% | 95.56% |
| 84  | ACCAT | 123.22% | 97.74% |
| 85  | ACCCA | 132.25% | 95.43% |
| 86  | ACCCC | 185.96% | 98.54% |
| 87  | ACCCG | 118.84% | 97.41% |
| 88  | ACCCT | 125.19% | 97.12% |
| 89  | ACCGA | 128.15% | 95.18% |
| 90  | ACCGC | 226.99% | 98.47% |
| 91  | ACCGG | 161.83% | 99.27% |
| 92  | ACCGT | 137.74% | 96.35% |
| 93  | ACCTA | 90.98%  | 92.56% |
| 94  | ACCTC | 76.90%  | 89.02% |
| 95  | ACCTG | 183.09% | 97.91% |
| 96  | ACCTT | 98.57%  | 91.23% |
| 97  | ACGAA | 96.62%  | 96.15% |
| 98  | ACGAC | 105.98% | 95.24% |
| 99  | ACGAG | 130.21% | 97.66% |
| 100 | ACGAT | 102.59% | 92.06% |
| 101 | ACGCA | 99.95%  | 95.93% |
| 102 | ACGCC | 152.39% | 97.87% |
| 103 | ACGCG | 112.00% | 90.32% |
| 104 | ACGCT | 66.99%  | 93.75% |
| 105 | ACGGA | 135.28% | 97.20% |
| 106 | ACGGC | 129.92% | 98.32% |
| 107 | ACGGG | 137.29% | 97.87% |
| 108 | ACGGT | 96.79%  | 98.67% |
| 109 | ACGTA | 75.26%  | 93.62% |
| 110 | ACGTC | 66.60%  | 90.16% |
| 111 | ACGTG | 126.40% | 98.32% |
| 112 | ACGTT | 74.79%  | 93.15% |
| 113 | ACTAA | 86.36%  | 91.88% |
| 114 | ACTAC | 89.42%  | 85.83% |
| 115 | ACTAG | 129.27% | 93.38% |
| 116 | ACTAT | 73.91%  | 88.68% |
| 117 | ACTCA | 101.82% | 96.03% |



|     |       |         |        |
|-----|-------|---------|--------|
| 118 | ACTCC | 158.35% | 96.71% |
| 119 | ACTCG | 134.09% | 97.41% |
| 120 | ACTCT | 66.00%  | 96.67% |
| 121 | ACTGA | 138.12% | 94.08% |
| 122 | ACTGC | 205.87% | 97.62% |
| 123 | ACTGG | 177.04% | 99.28% |
| 124 | ACTGT | 145.51% | 94.93% |
| 125 | ACTTA | 78.24%  | 93.22% |
| 126 | ACTTC | 101.79% | 95.88% |
| 127 | ACTTG | 156.01% | 98.19% |
| 128 | ACTTT | 80.13%  | 90.11% |
| 129 | AGAAA | 43.93%  | 89.47% |
| 130 | AGAAC | 82.21%  | 93.10% |
| 131 | AGAAG | 93.80%  | 89.09% |
| 132 | AGAAT | 56.09%  | 87.64% |
| 133 | AGACA | 92.60%  | 92.05% |
| 134 | AGACC | 124.34% | 96.03% |
| 135 | AGACG | 101.55% | 96.04% |
| 136 | AGACT | 55.84%  | 84.85% |
| 137 | AGAGA | 95.11%  | 95.04% |
| 138 | AGAGC | 133.34% | 96.09% |
| 139 | AGAGG | 124.28% | 95.74% |
| 140 | AGAGT | 108.08% | 94.23% |
| 141 | AGATA | 66.91%  | 84.62% |
| 142 | AGATC | 49.02%  | 84.00% |
| 143 | AGATG | 125.02% | 94.66% |
| 144 | AGATT | 52.68%  | 80.88% |
| 145 | AGCAA | 76.29%  | 95.45% |
| 146 | AGCAC | 106.63% | 97.67% |
| 147 | AGCAG | 128.47% | 94.78% |
| 148 | AGCAT | 119.20% | 93.28% |
| 149 | AGCCA | 114.59% | 94.70% |
| 150 | AGCCC | 171.17% | 96.91% |
| 151 | AGCCG | 81.14%  | 92.54% |
| 152 | AGCCT | 80.87%  | 93.59% |
| 153 | AGCGA | 82.71%  | 95.45% |
| 154 | AGCGC | 150.78% | 88.28% |
| 155 | AGCGG | 200.72% | 94.87% |
| 156 | AGCGT | 152.90% | 94.83% |
| 157 | AGCTA | 61.01%  | 85.19% |
| 158 | AGCTC | 53.47%  | 93.62% |
| 159 | AGCTG | 199.63% | 98.09% |
| 160 | AGCTT | 78.15%  | 89.87% |
| 161 | AGGAA | 65.32%  | 94.05% |
| 162 | AGGAC | 101.41% | 96.84% |
| 163 | AGGAG | 89.31%  | 92.75% |

|     |       |         |         |
|-----|-------|---------|---------|
| 164 | AGGAT | 54.95%  | 71.70%  |
| 165 | AGGCA | 80.69%  | 93.83%  |
| 166 | AGGCC | 129.70% | 96.75%  |
| 167 | AGGCG | 79.08%  | 95.00%  |
| 168 | AGGCT | 38.07%  | 87.10%  |
| 169 | AGGGA | 121.44% | 100.00% |
| 170 | AGGGC | 150.61% | 80.00%  |
| 171 | AGGGG | 87.56%  | 91.67%  |
| 172 | AGGGT | 99.20%  | 100.00% |
| 173 | AGGTA | 68.26%  | 89.39%  |
| 174 | AGGTC | 67.68%  | 100.00% |
| 175 | AGGTG | 161.76% | 97.35%  |
| 176 | AGGTT | 56.60%  | 76.60%  |
| 177 | AGTAA | 76.09%  | 90.91%  |
| 178 | AGTAC | 100.33% | 80.00%  |
| 179 | AGTAG | 119.84% | 89.72%  |
| 180 | AGTAT | 59.17%  | 90.67%  |
| 181 | AGTCA | 117.74% | 91.60%  |
| 182 | AGTCC | 147.41% | 98.51%  |
| 183 | AGTCG | 139.30% | 95.40%  |
| 184 | AGTCT | 57.17%  | 91.67%  |
| 185 | AGTGA | 109.52% | 92.11%  |
| 186 | AGTGC | 202.00% | 99.39%  |
| 187 | AGTGG | 172.93% | 100.00% |
| 188 | AGTGT | 121.78% | 97.00%  |
| 189 | AGTTA | 66.79%  | 86.81%  |
| 190 | AGTTC | 68.26%  | 87.30%  |
| 191 | AGTTG | 168.65% | 97.89%  |
| 192 | AGTTT | 69.76%  | 88.73%  |
| 193 | ATAAA | 44.18%  | 90.08%  |
| 194 | ATAAC | 71.37%  | 79.86%  |
| 195 | ATAAG | 85.94%  | 94.62%  |
| 196 | ATAAT | 54.91%  | 81.51%  |
| 197 | ATACA | 83.63%  | 87.88%  |
| 198 | ATACC | 110.39% | 93.41%  |
| 199 | ATACG | 118.36% | 96.45%  |
| 200 | ATACT | 57.55%  | 91.46%  |
| 201 | ATAGA | 83.12%  | 94.24%  |
| 202 | ATAGC | 138.45% | 96.93%  |
| 203 | ATAGG | 115.91% | 95.50%  |
| 204 | ATAGT | 88.21%  | 93.69%  |
| 205 | ATATA | 52.38%  | 88.98%  |
| 206 | ATATC | 79.70%  | 95.28%  |
| 207 | ATATG | 112.94% | 96.03%  |
| 208 | ATATT | 69.40%  | 88.99%  |
| 209 | ATCAA | 111.73% | 95.98%  |

|     |       |         |         |
|-----|-------|---------|---------|
| 210 | ATCAC | 116.03% | 92.99%  |
| 211 | ATCAG | 147.14% | 93.21%  |
| 212 | ATCAT | 101.35% | 94.53%  |
| 213 | ATCCA | 143.32% | 92.82%  |
| 214 | ATCCC | 201.75% | 95.85%  |
| 215 | ATCCG | 171.18% | 97.81%  |
| 216 | ATCCT | 119.40% | 94.83%  |
| 217 | ATCGA | 142.37% | 93.90%  |
| 218 | ATCGC | 218.84% | 99.02%  |
| 219 | ATCGG | 221.66% | 100.00% |
| 220 | ATCGT | 141.34% | 97.48%  |
| 221 | ATCTA | 86.02%  | 91.38%  |
| 222 | ATCTC | 111.60% | 95.15%  |
| 223 | ATCTG | 181.84% | 98.01%  |
| 224 | ATCTT | 100.94% | 93.40%  |
| 225 | ATGAA | 81.13%  | 96.50%  |
| 226 | ATGAC | 116.15% | 88.19%  |
| 227 | ATGAG | 99.27%  | 96.26%  |
| 228 | ATGAT | 93.73%  | 92.79%  |
| 229 | ATGCA | 114.01% | 97.32%  |
| 230 | ATGCC | 147.72% | 97.33%  |
| 231 | ATGCG | 138.09% | 96.92%  |
| 232 | ATGCT | 94.03%  | 95.40%  |
| 233 | ATGGA | 92.19%  | 95.15%  |
| 234 | ATGGC | 204.97% | 98.28%  |
| 235 | ATGGG | 184.61% | 100.00% |
| 236 | ATGGT | 116.40% | 95.92%  |
| 237 | ATGTA | 75.30%  | 87.50%  |
| 238 | ATGTC | 77.60%  | 85.71%  |
| 239 | ATGTG | 147.46% | 100.00% |
| 240 | ATGTT | 74.95%  | 90.24%  |
| 241 | ATTAA | 73.04%  | 92.55%  |
| 242 | ATTAC | 92.35%  | 92.03%  |
| 243 | ATTAG | 118.82% | 94.62%  |
| 244 | ATTAT | 37.17%  | 29.63%  |
| 245 | ATTCA | 106.59% | 96.50%  |
| 246 | ATTCC | 165.74% | 98.80%  |
| 247 | ATTCG | 165.23% | 99.25%  |
| 248 | ATTCT | 61.45%  | 75.44%  |
| 249 | ATTGA | 106.87% | 92.21%  |
| 250 | ATTGC | 155.82% | 97.69%  |
| 251 | ATTGG | 173.68% | 96.40%  |
| 252 | ATTGT | 96.52%  | 94.79%  |
| 253 | ATTTA | 67.39%  | 88.98%  |
| 254 | ATTTC | 86.65%  | 92.39%  |
| 255 | ATTTG | 112.12% | 100.00% |

256

ATTTT

61.98%

89.87%

## Supporting Figures

Figure S1. amine-modified ANNNN sequence logos

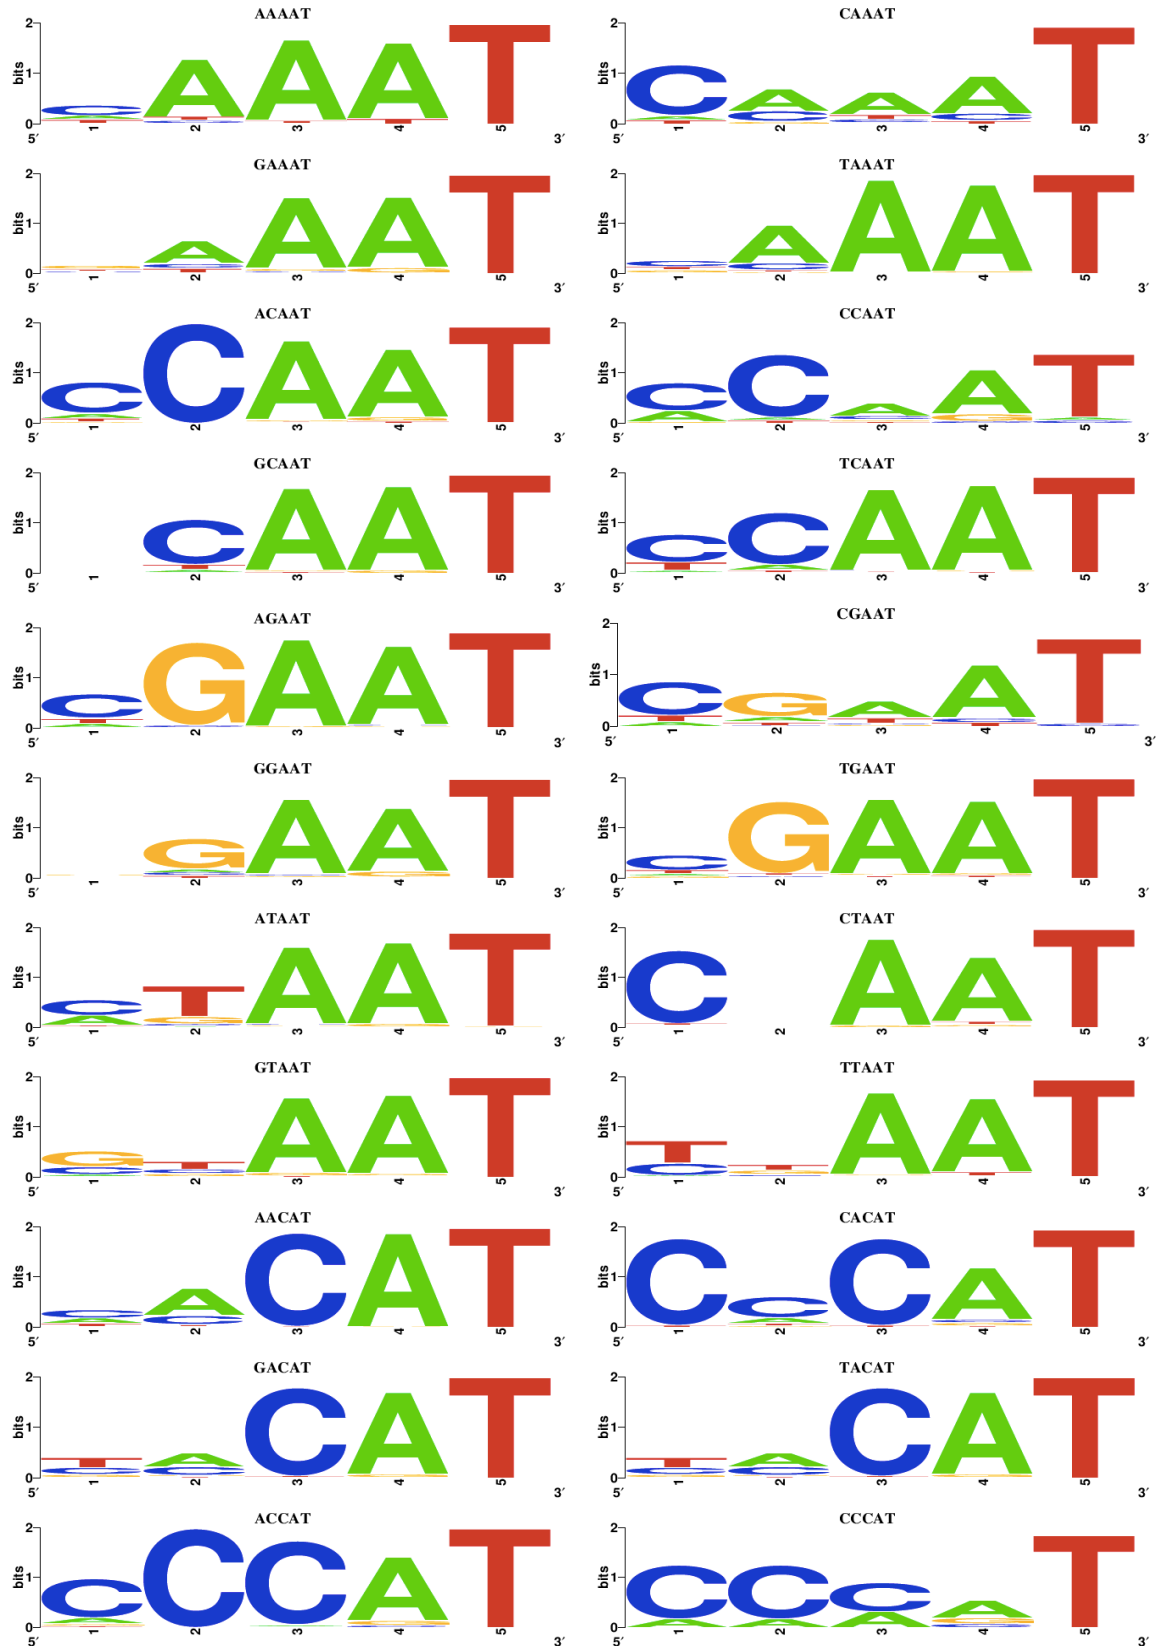

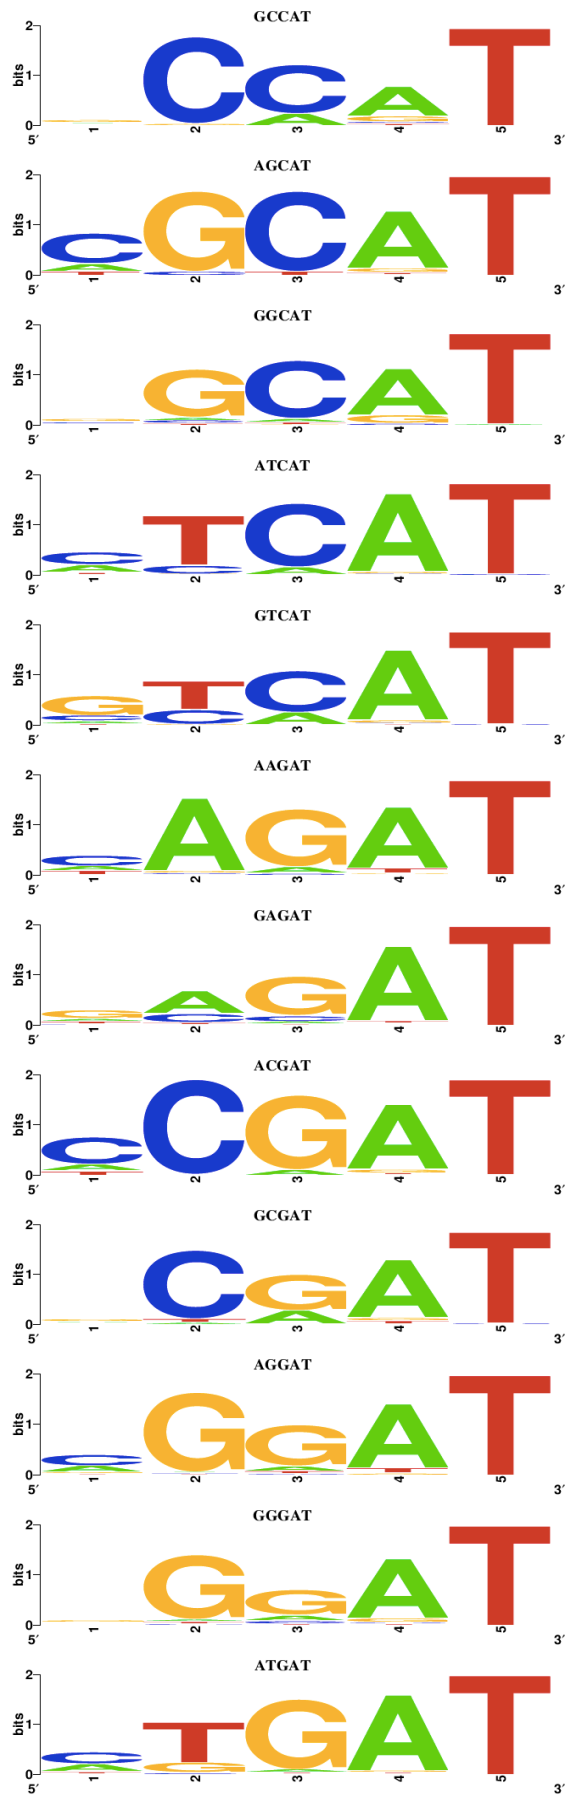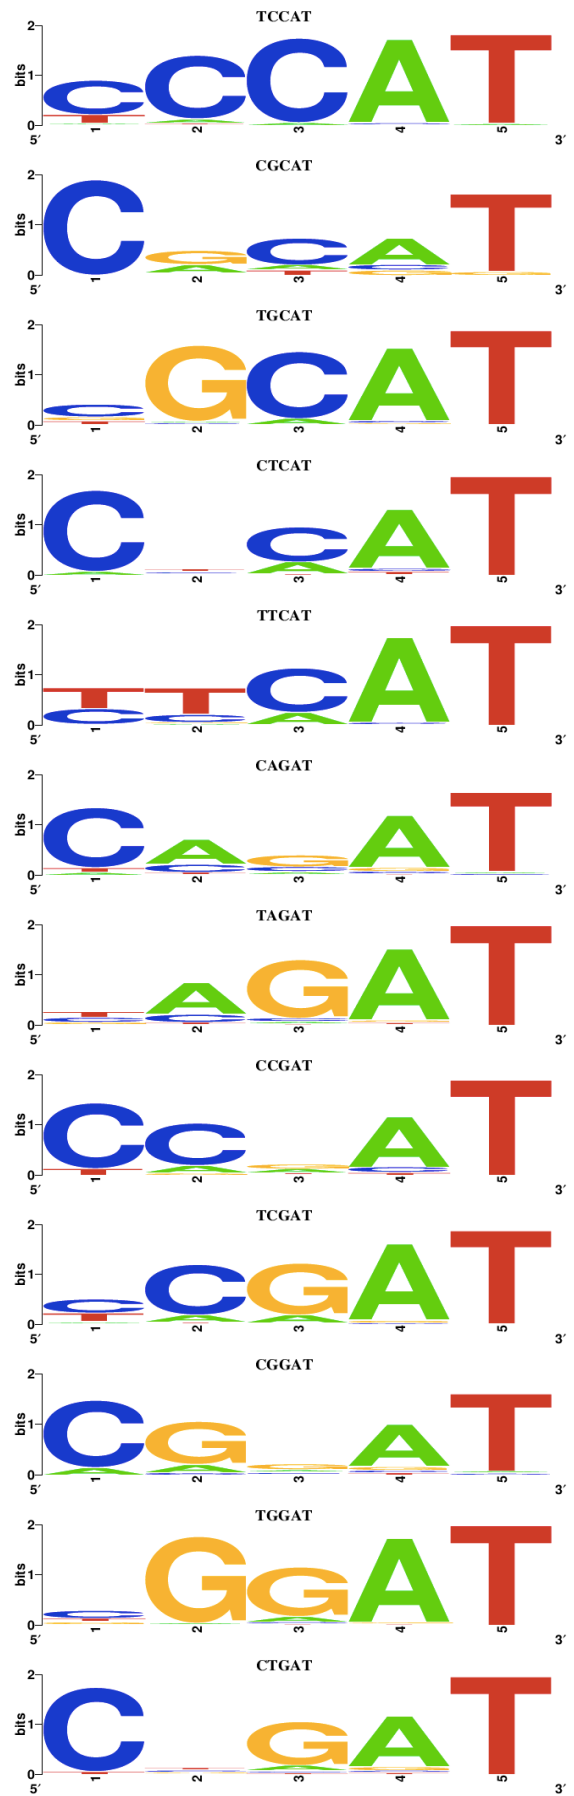

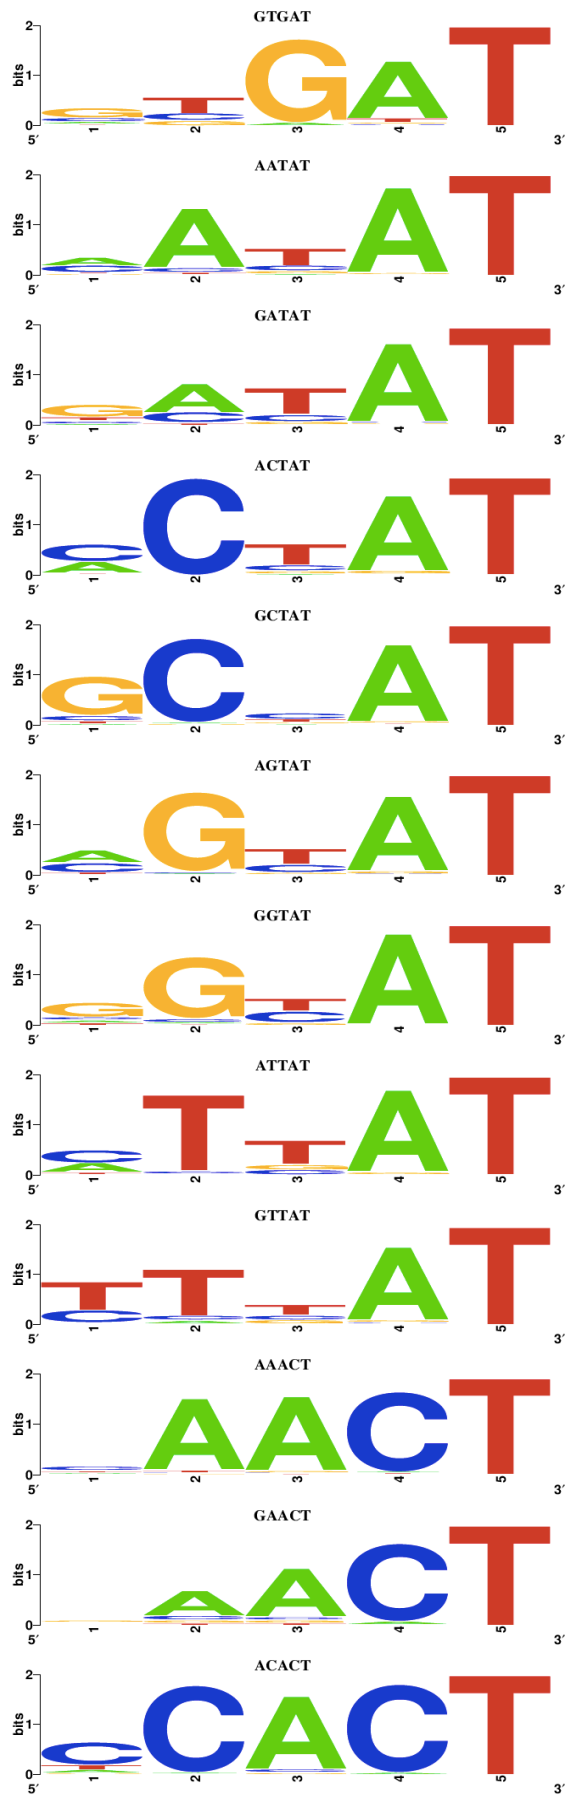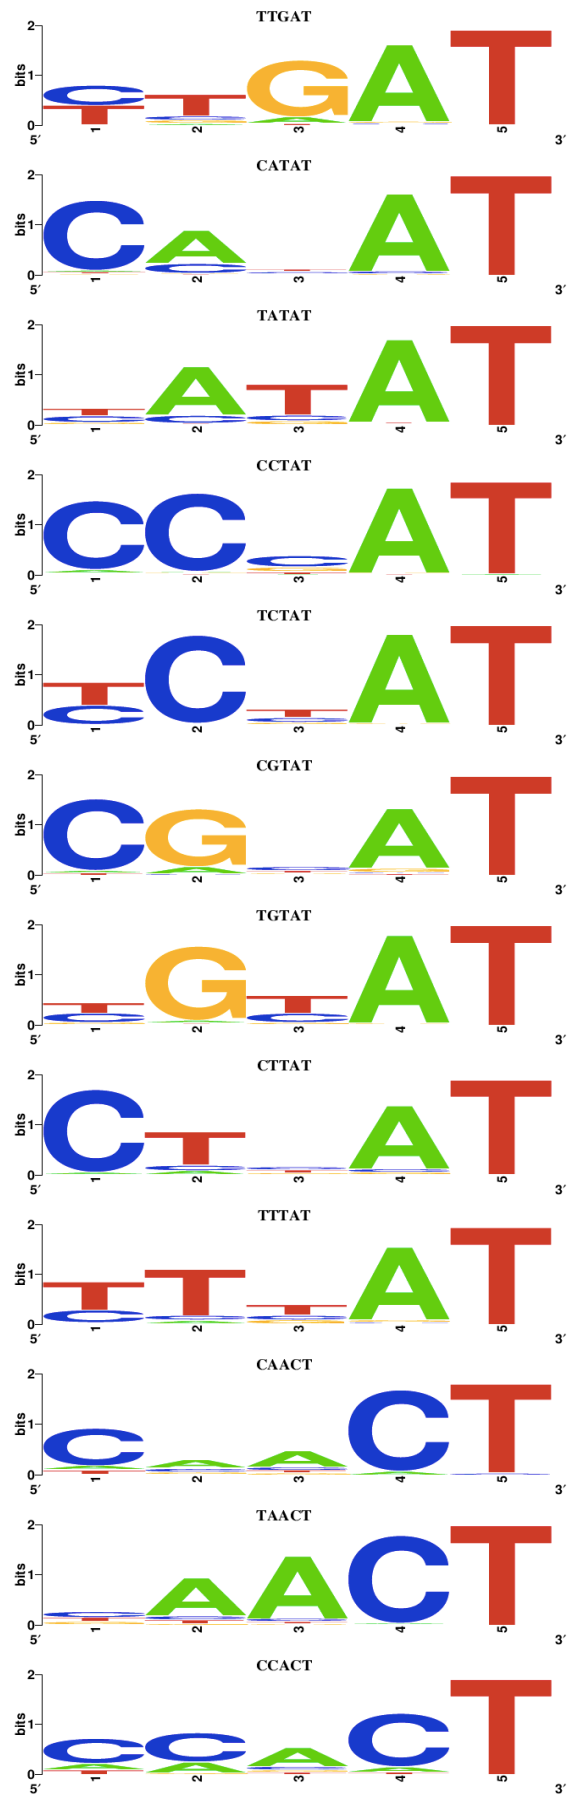

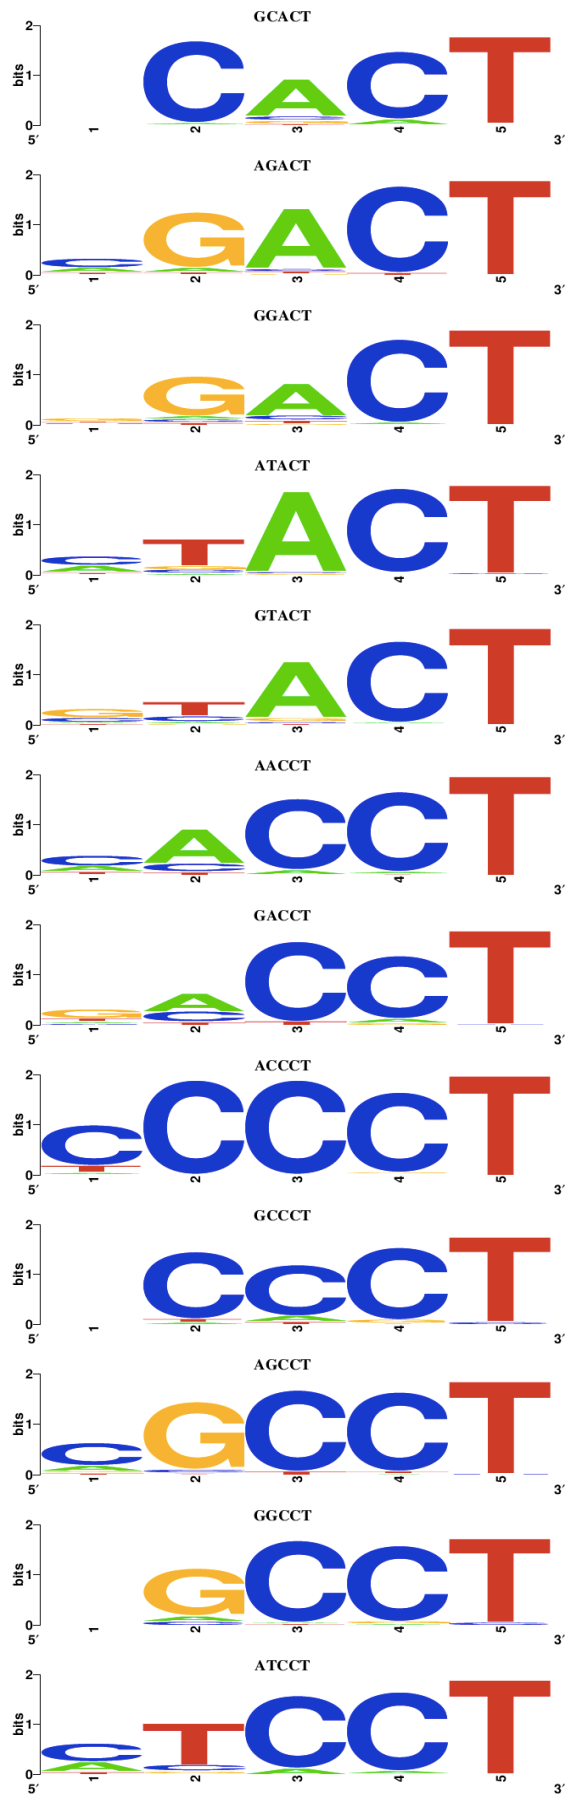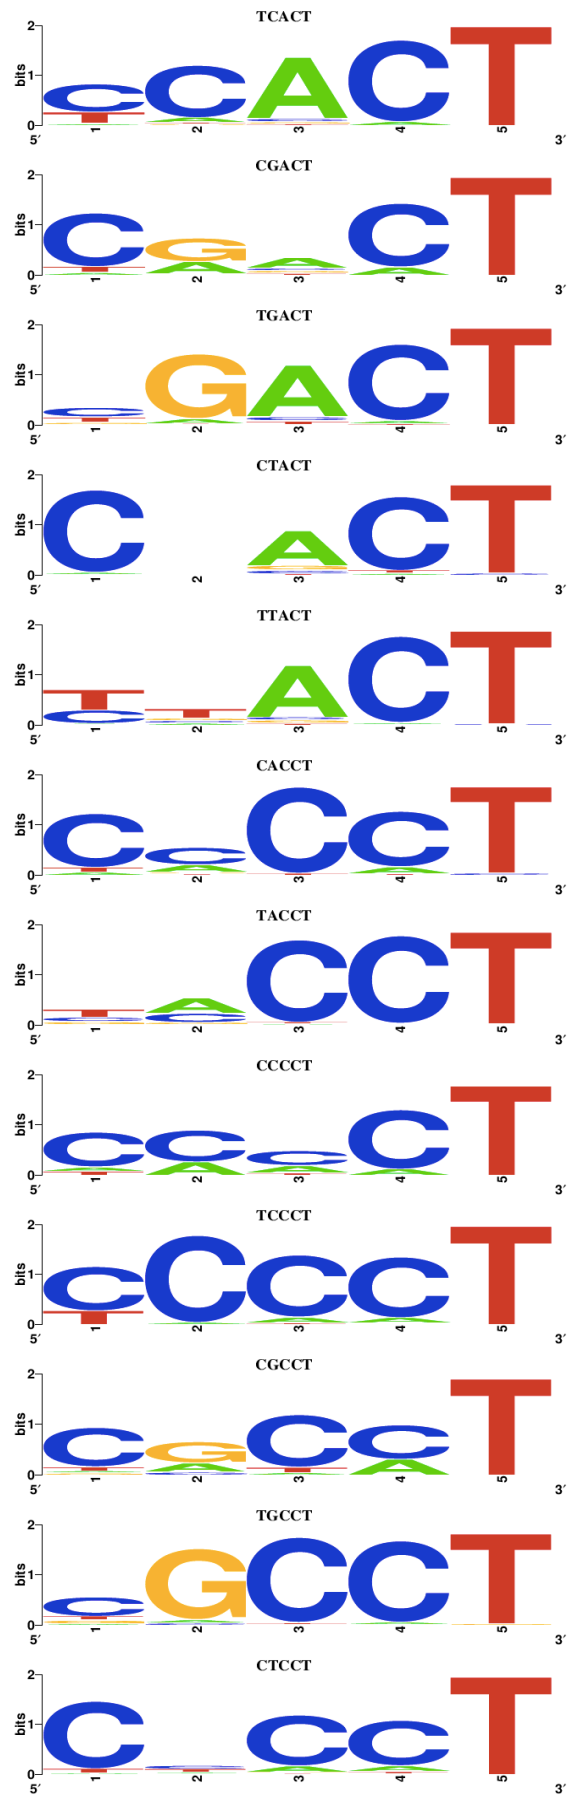





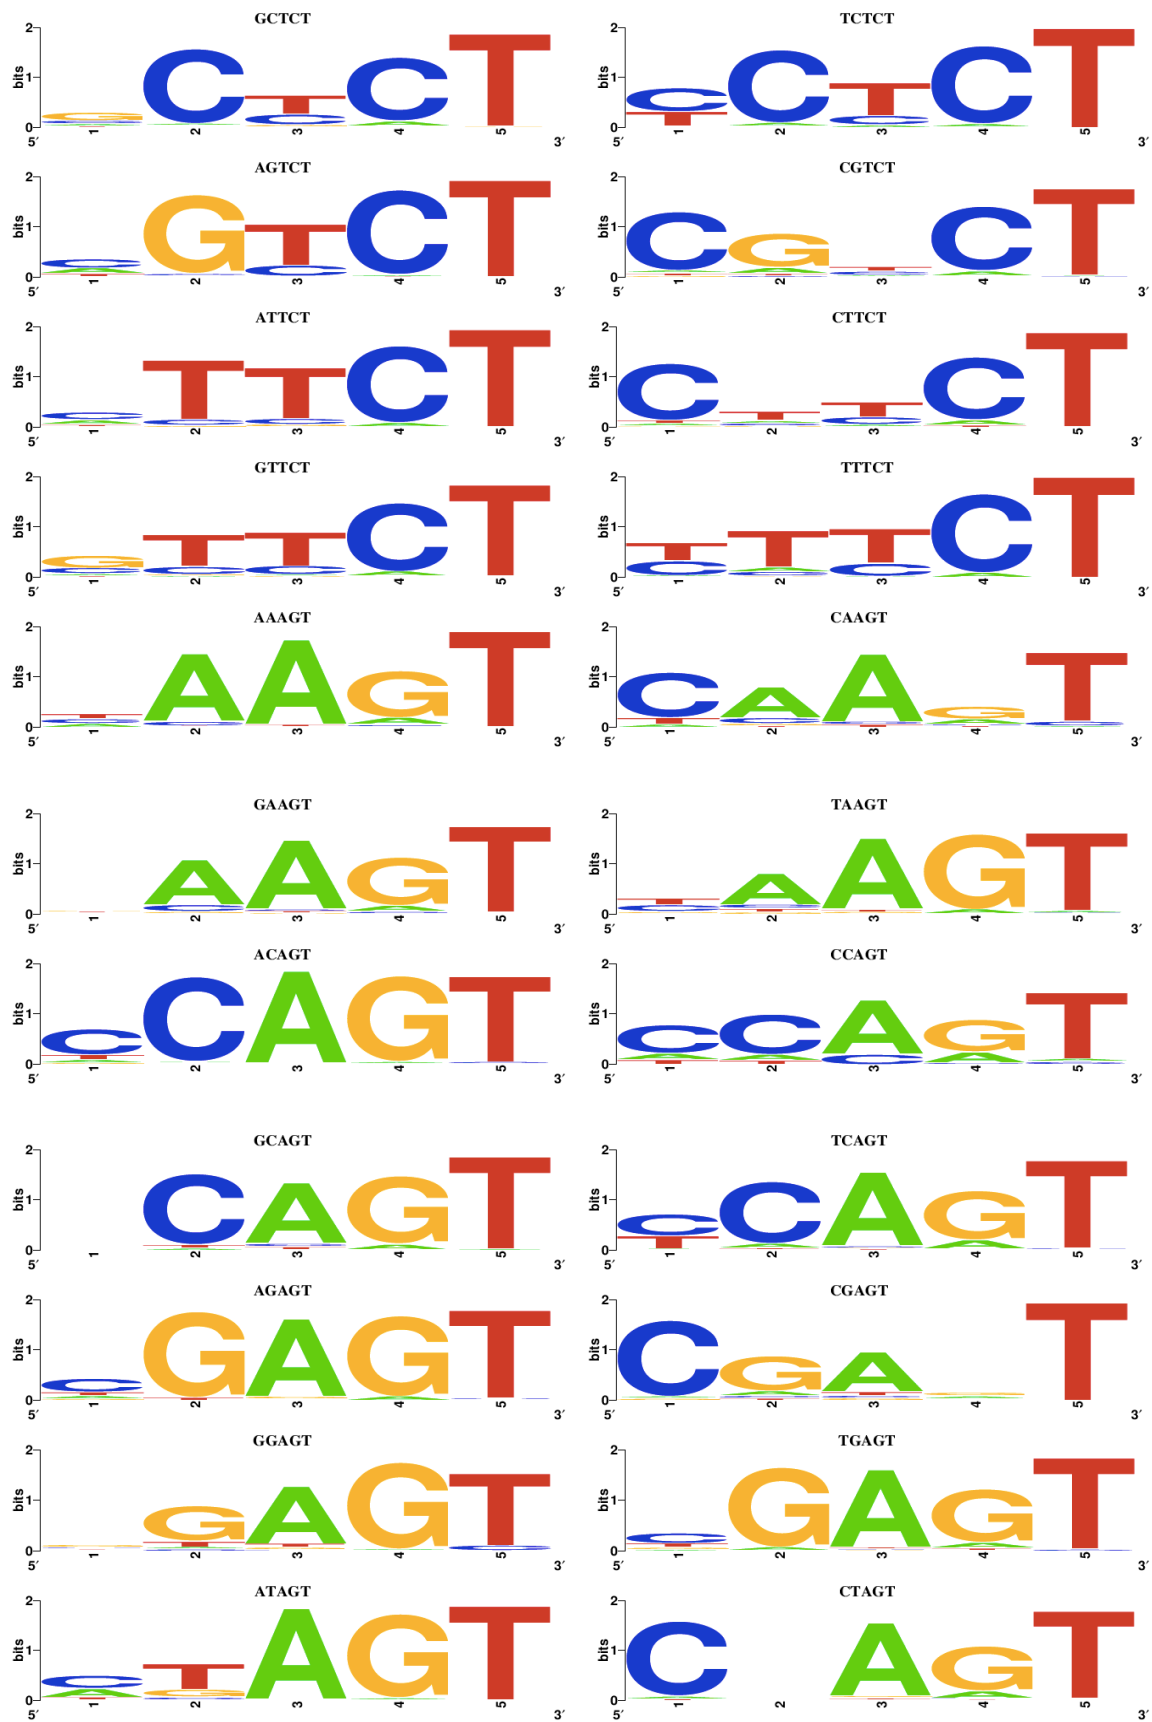

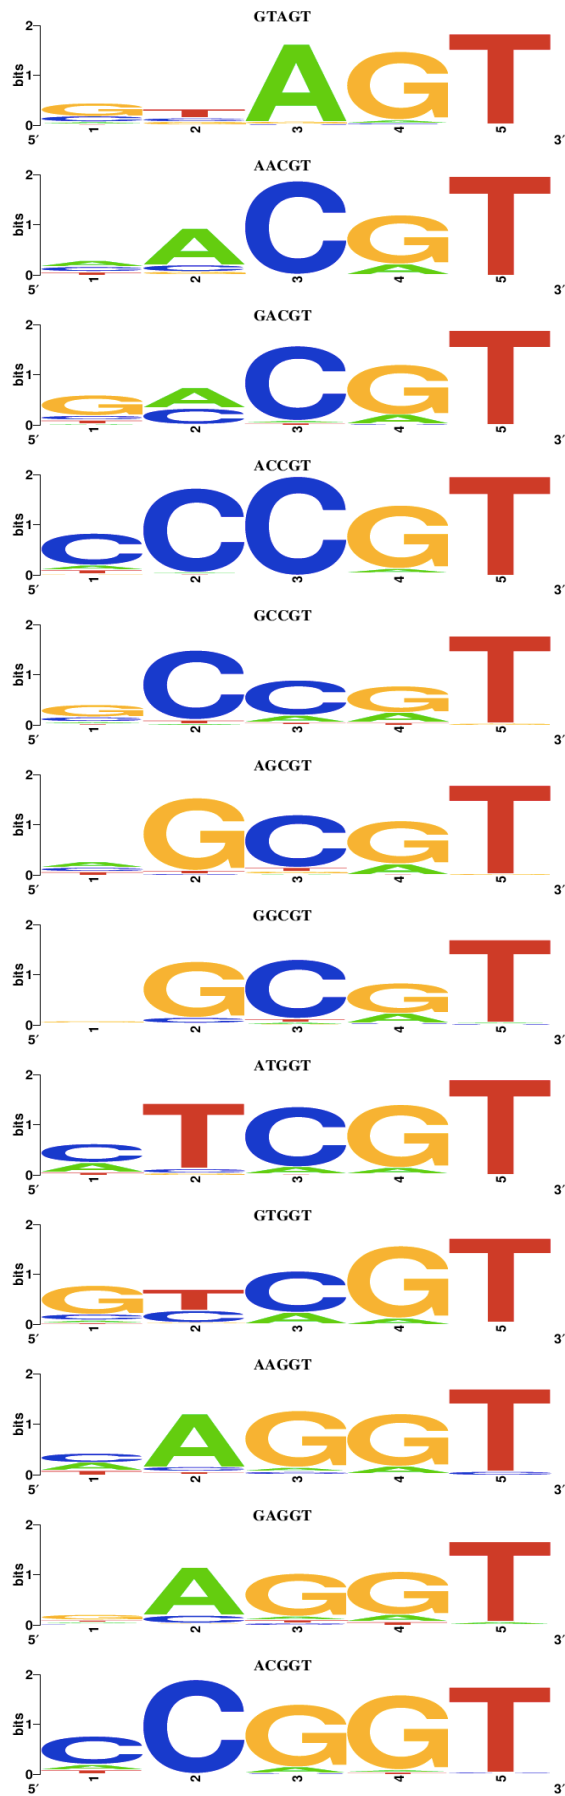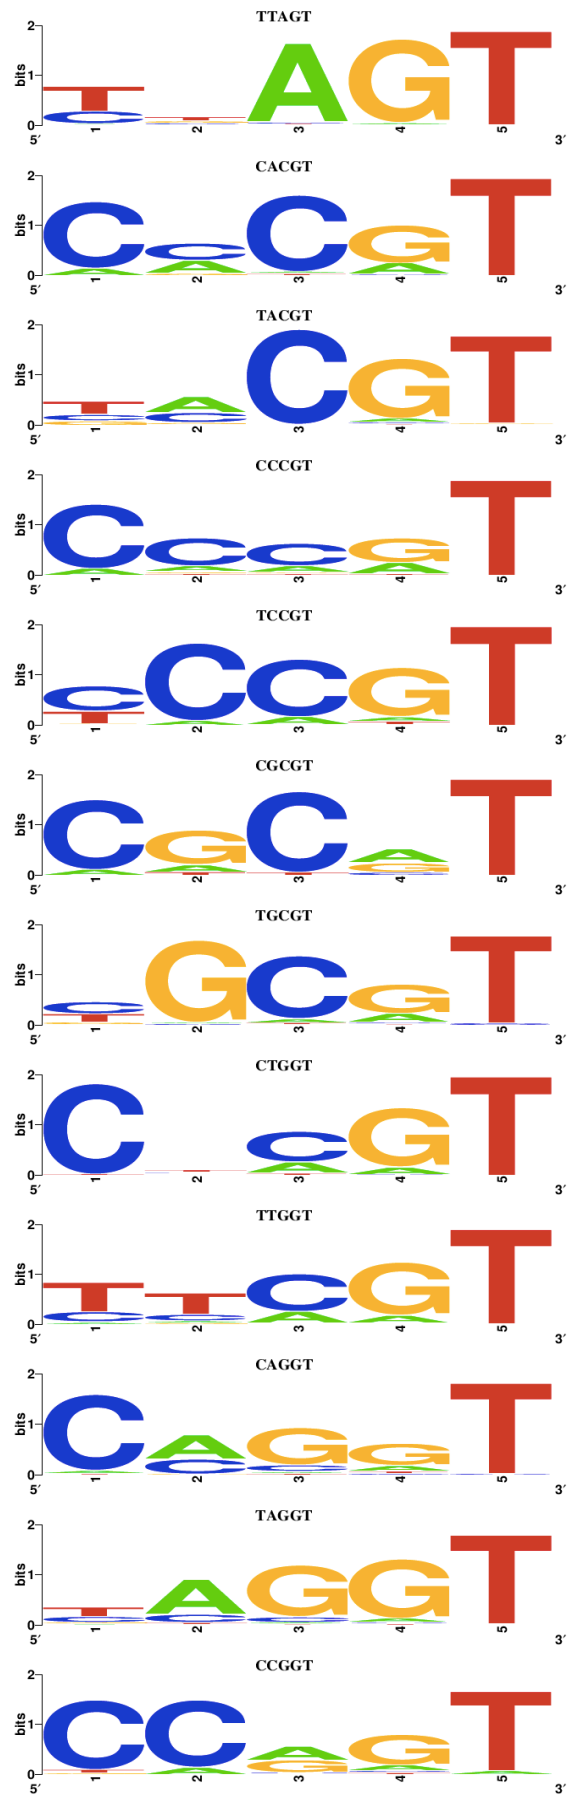

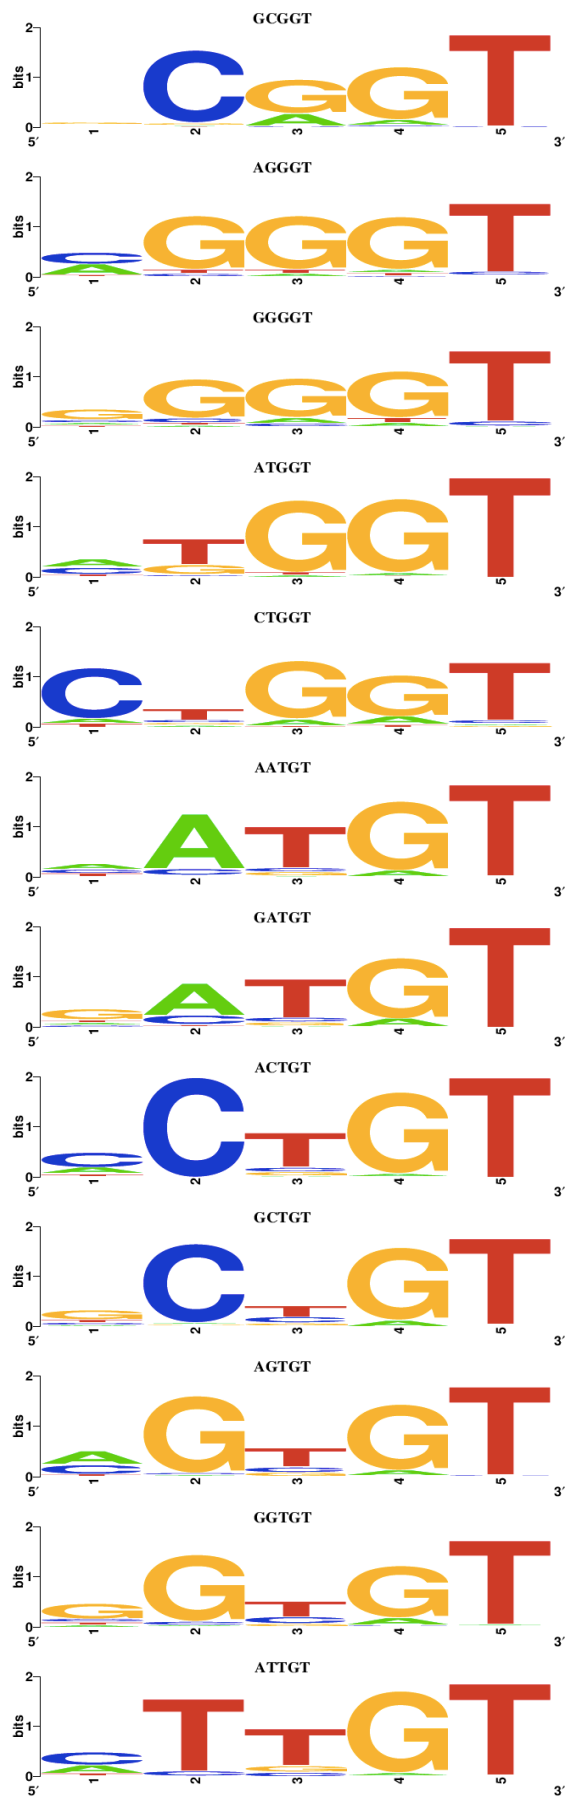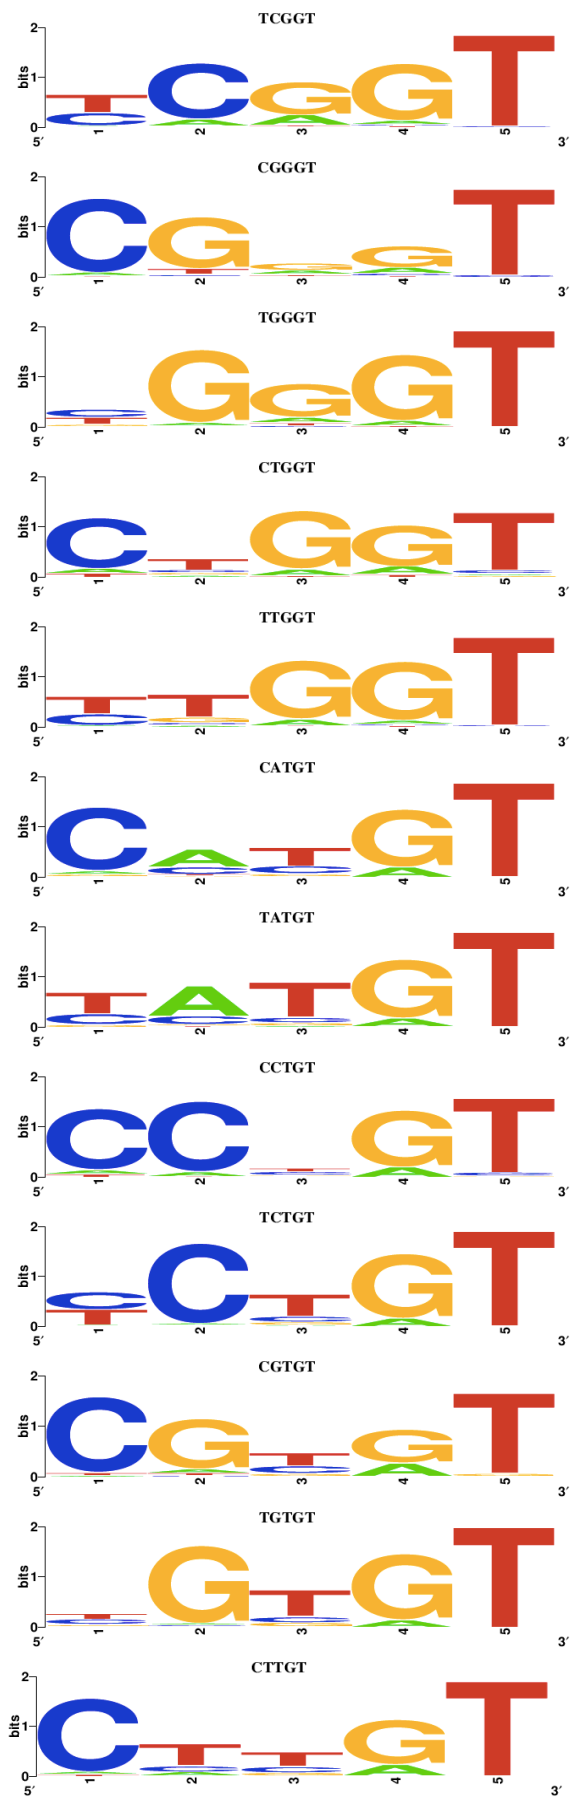

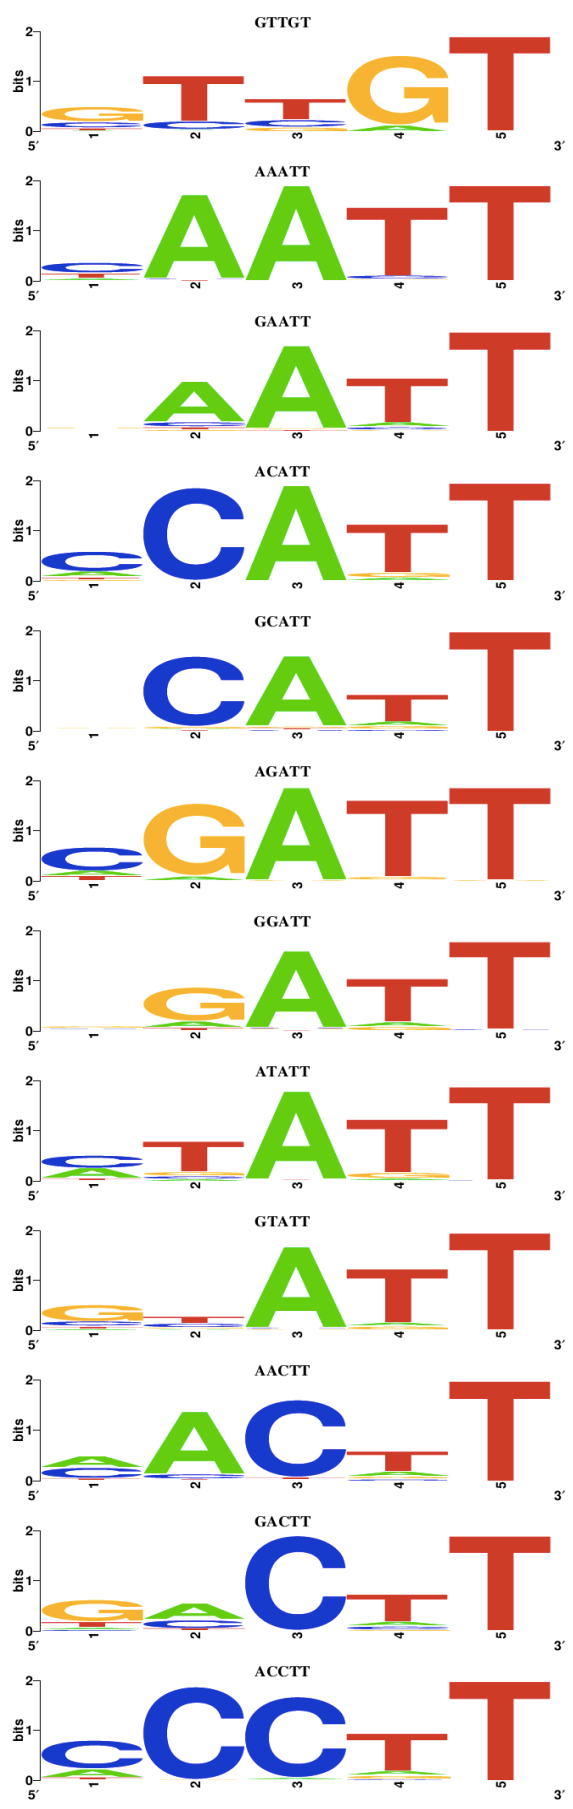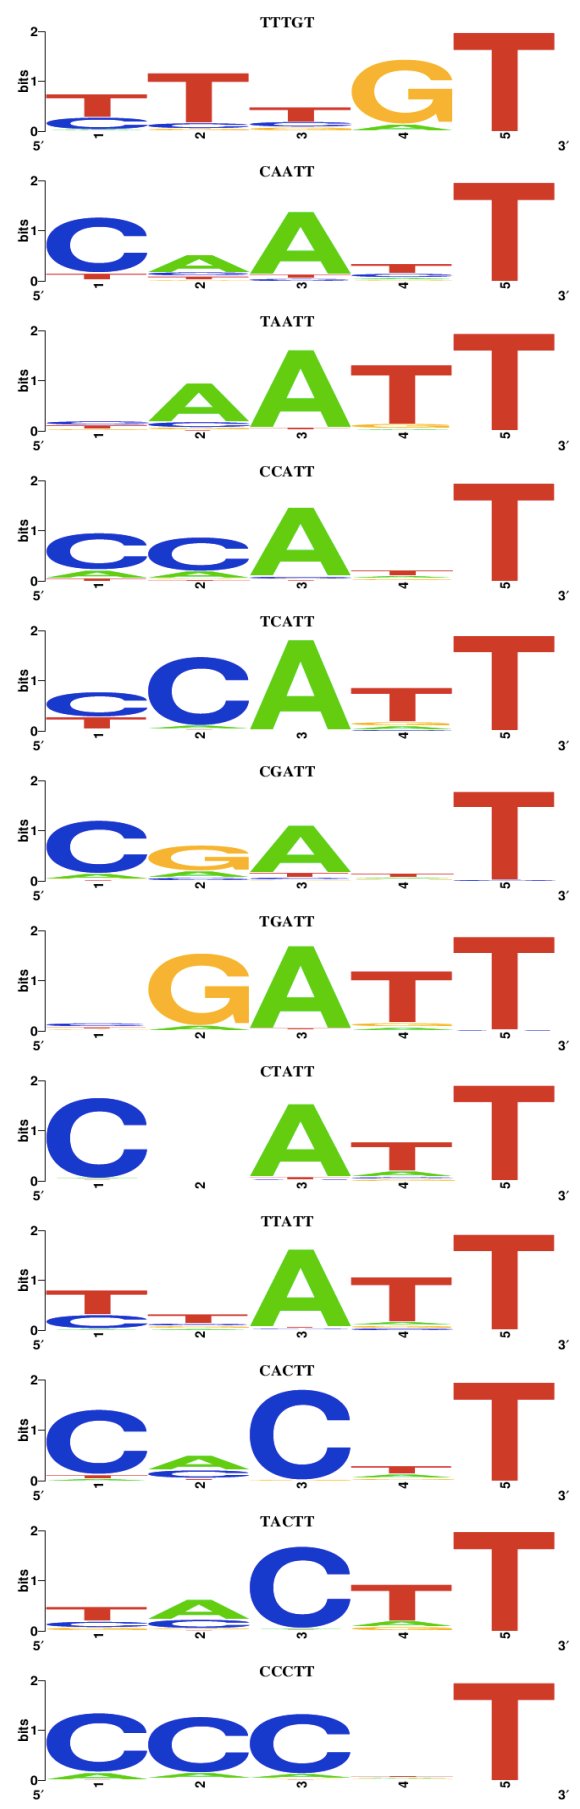

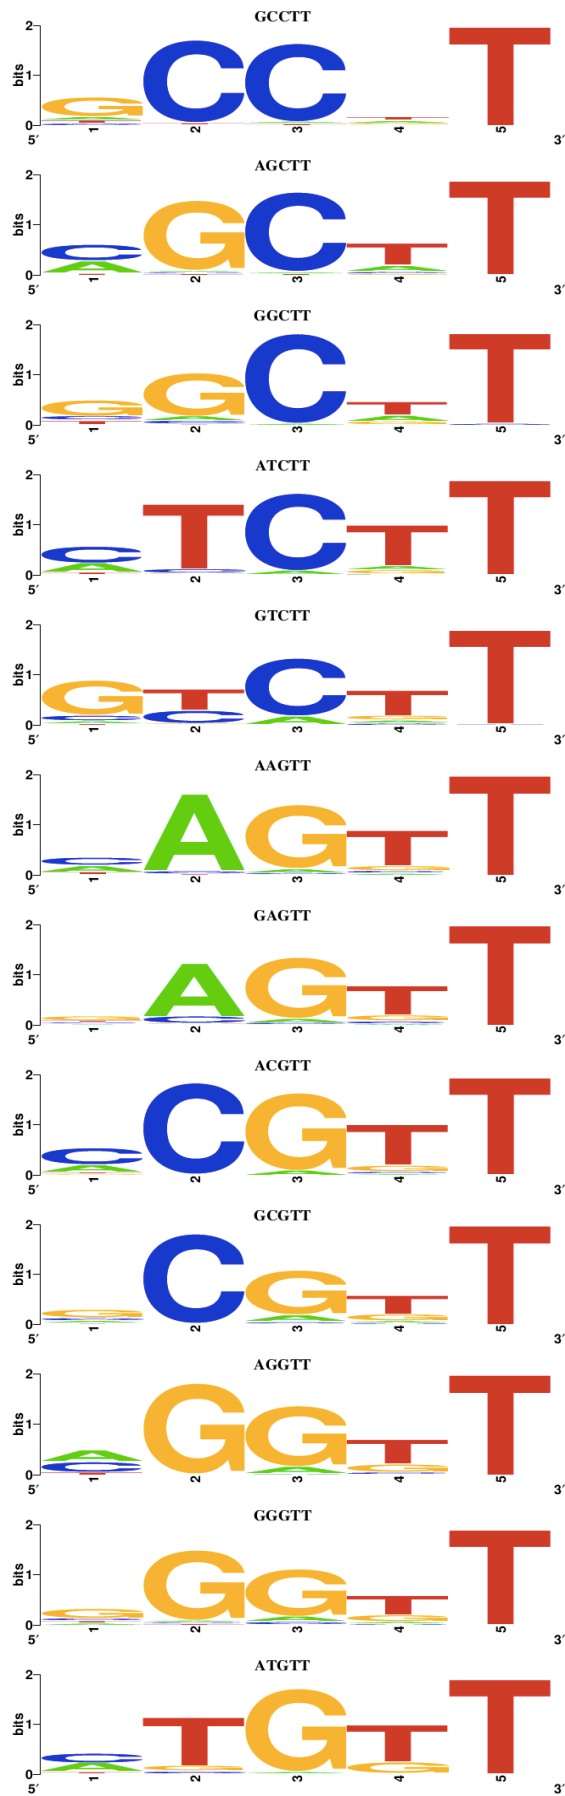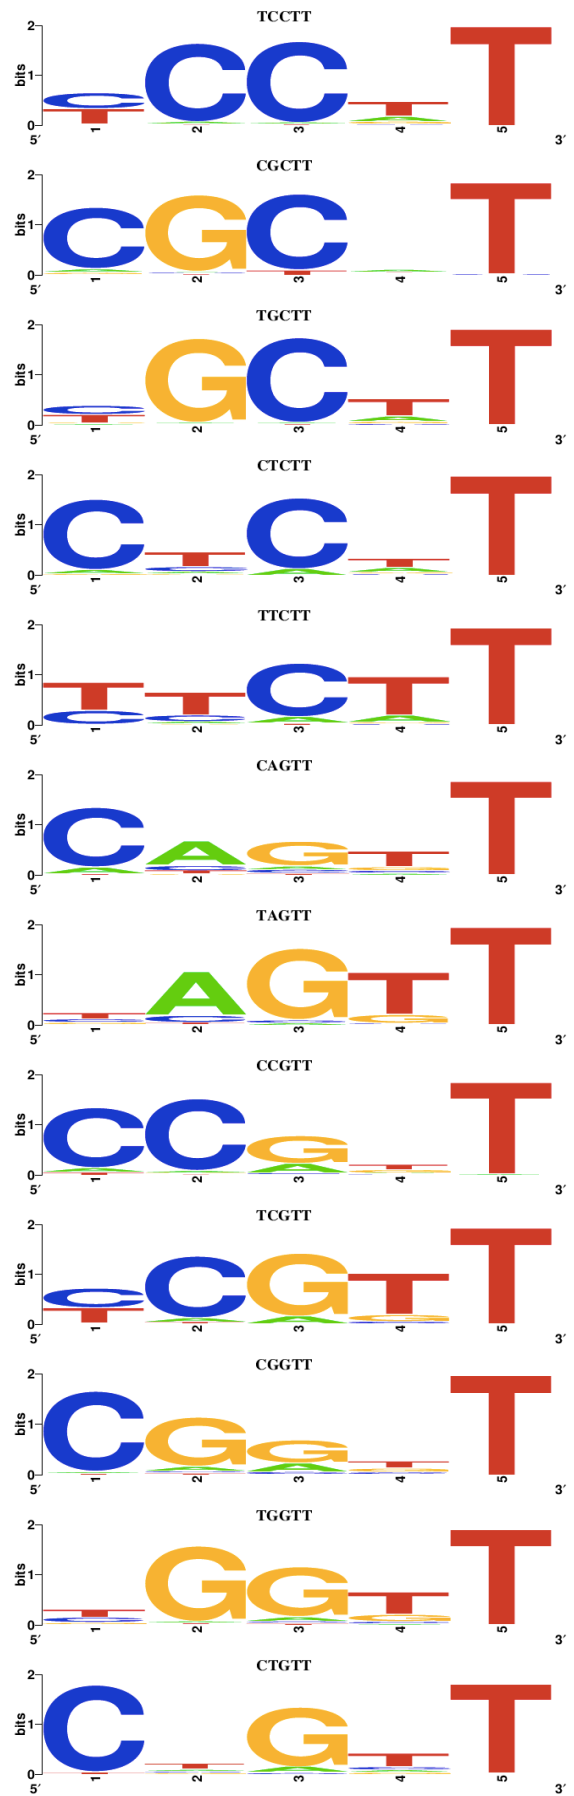

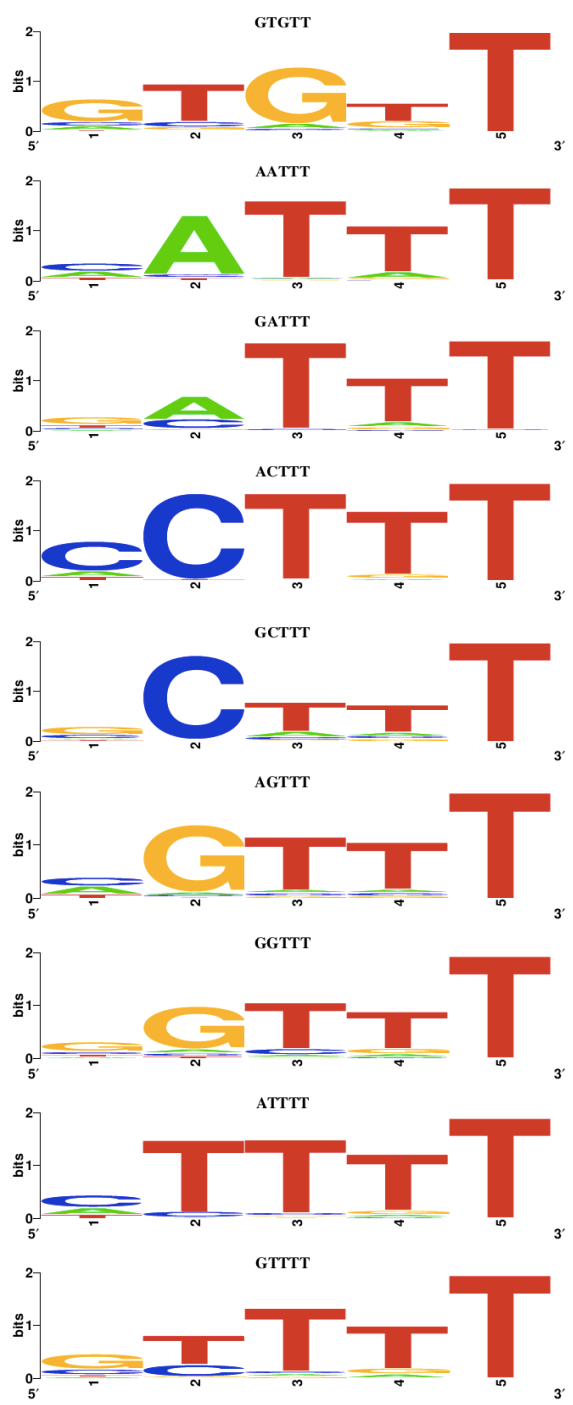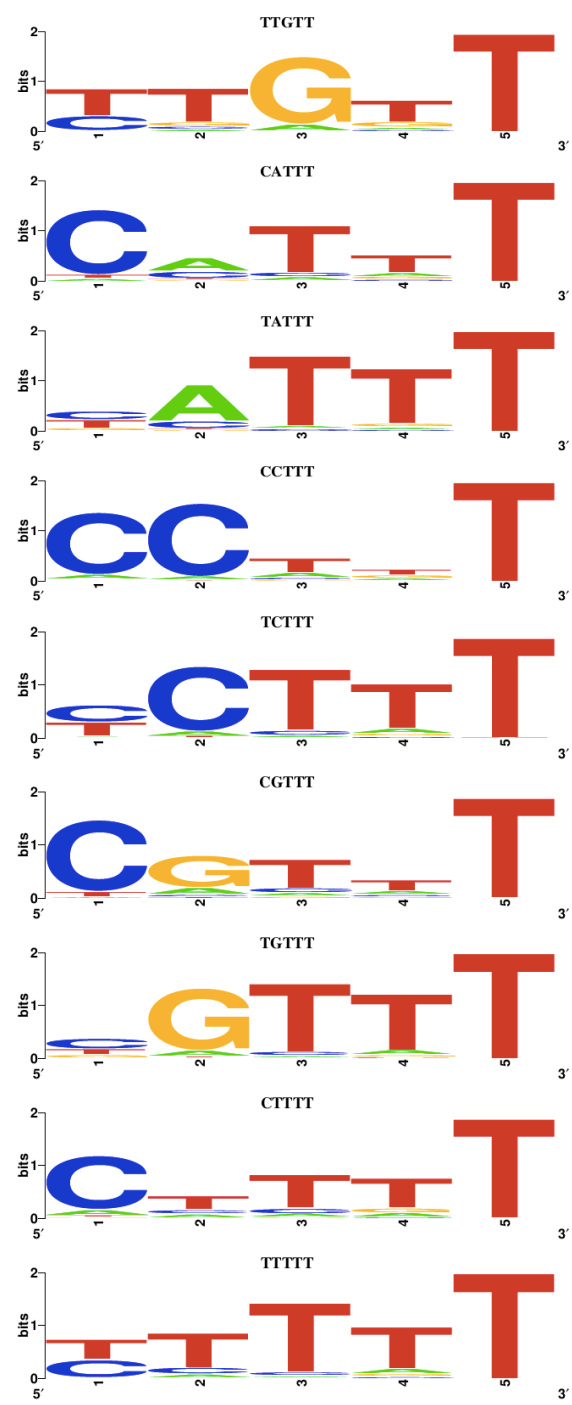

Figure S2. phenyl-modified ANNNN sequence logos

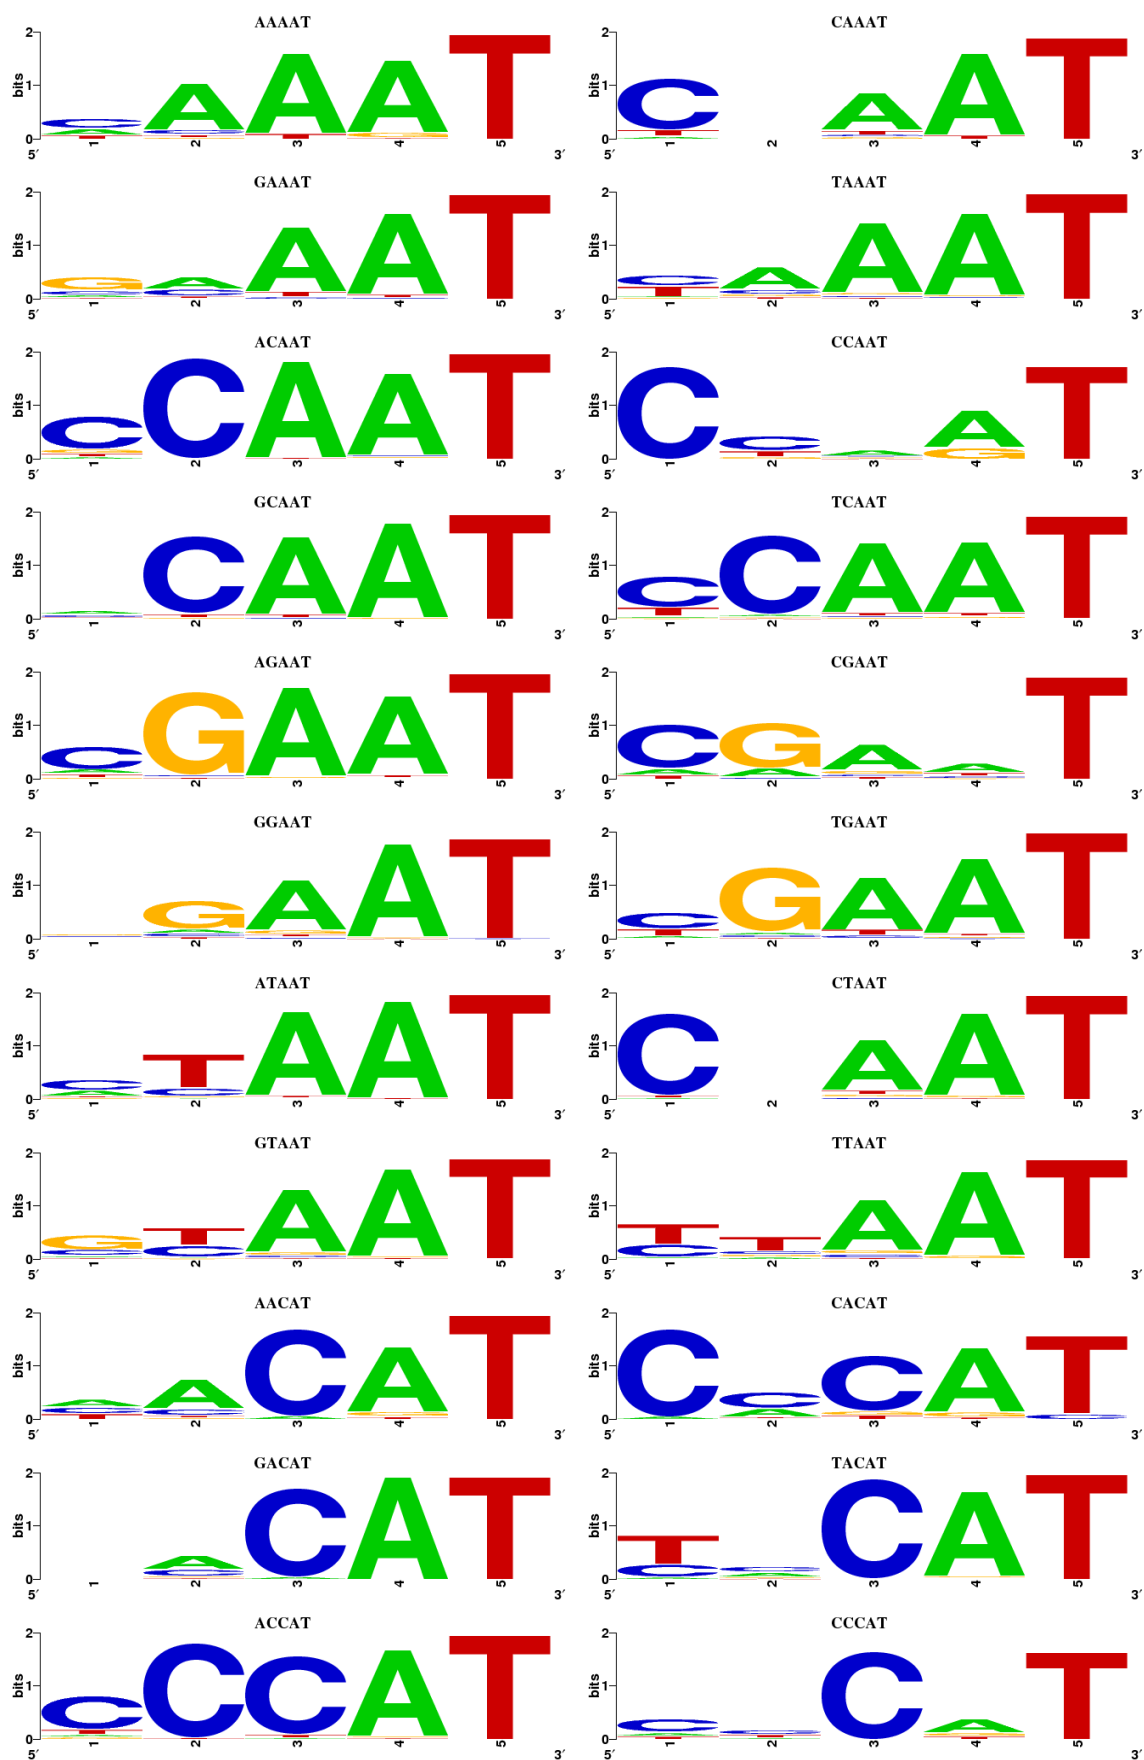



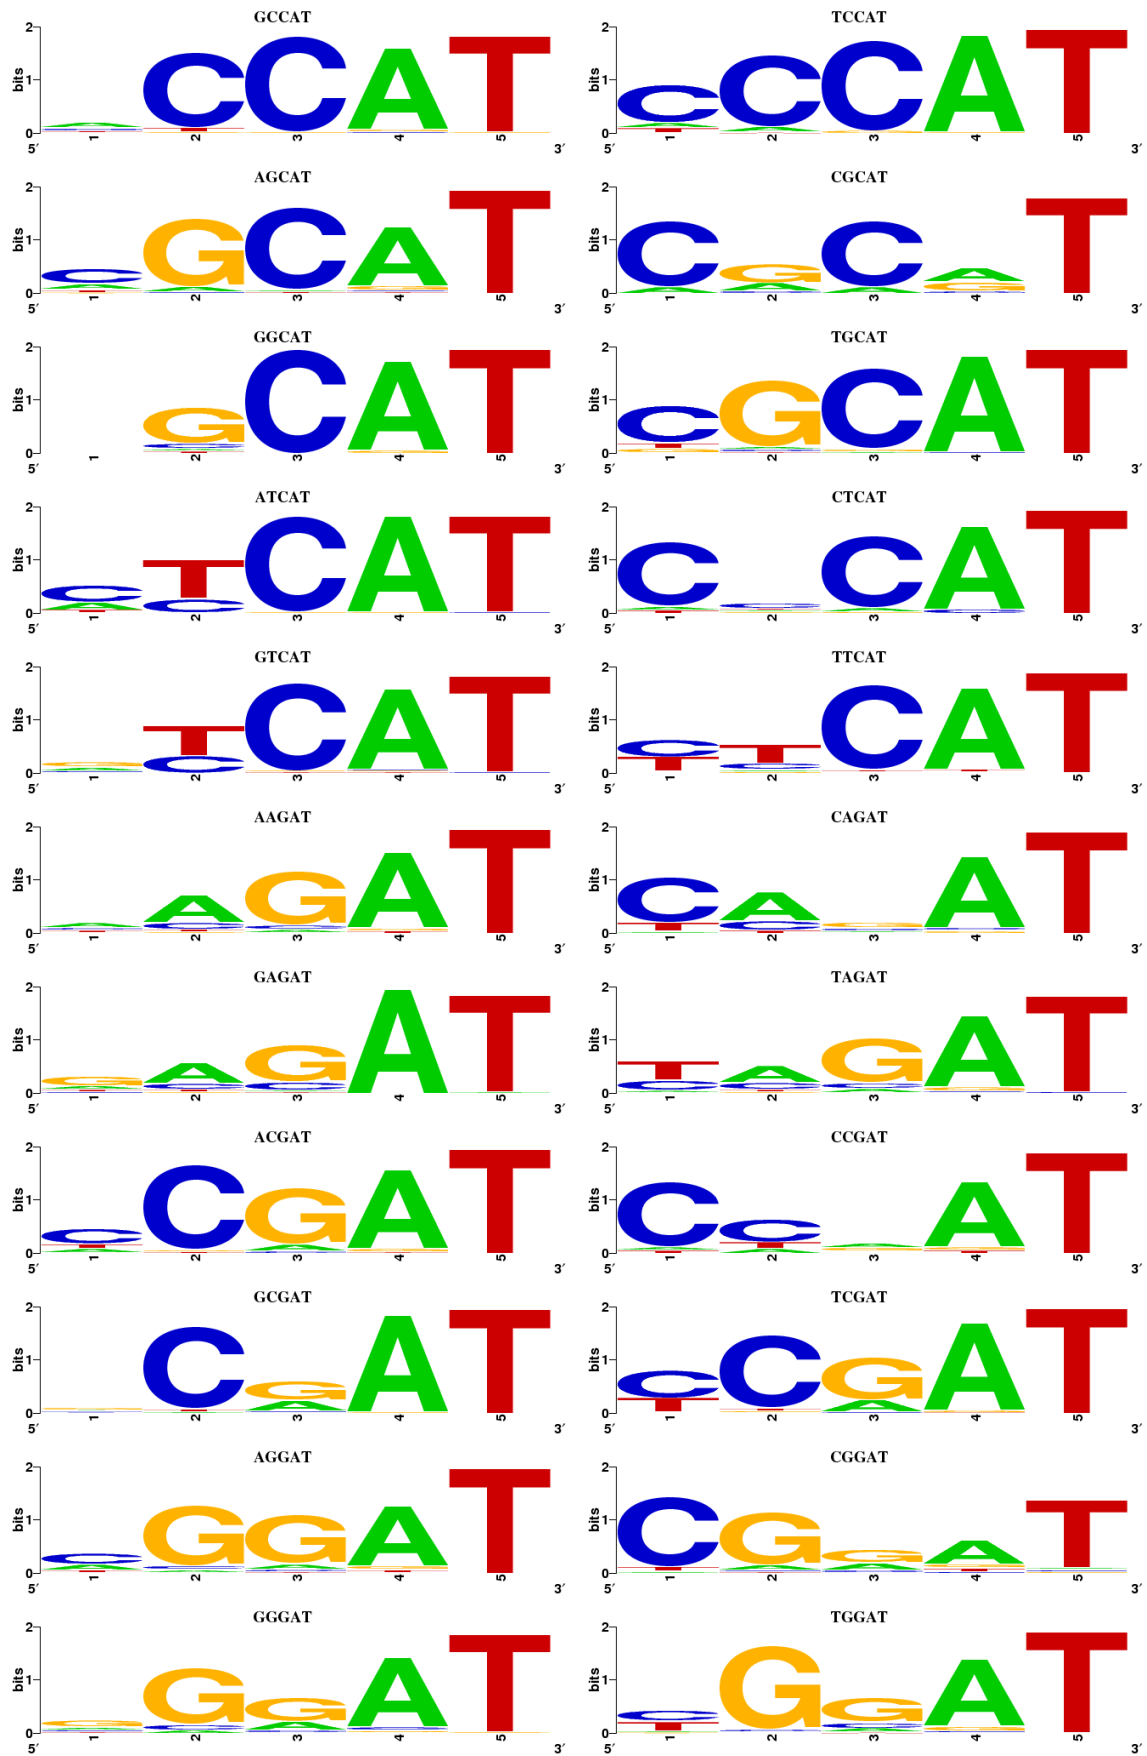

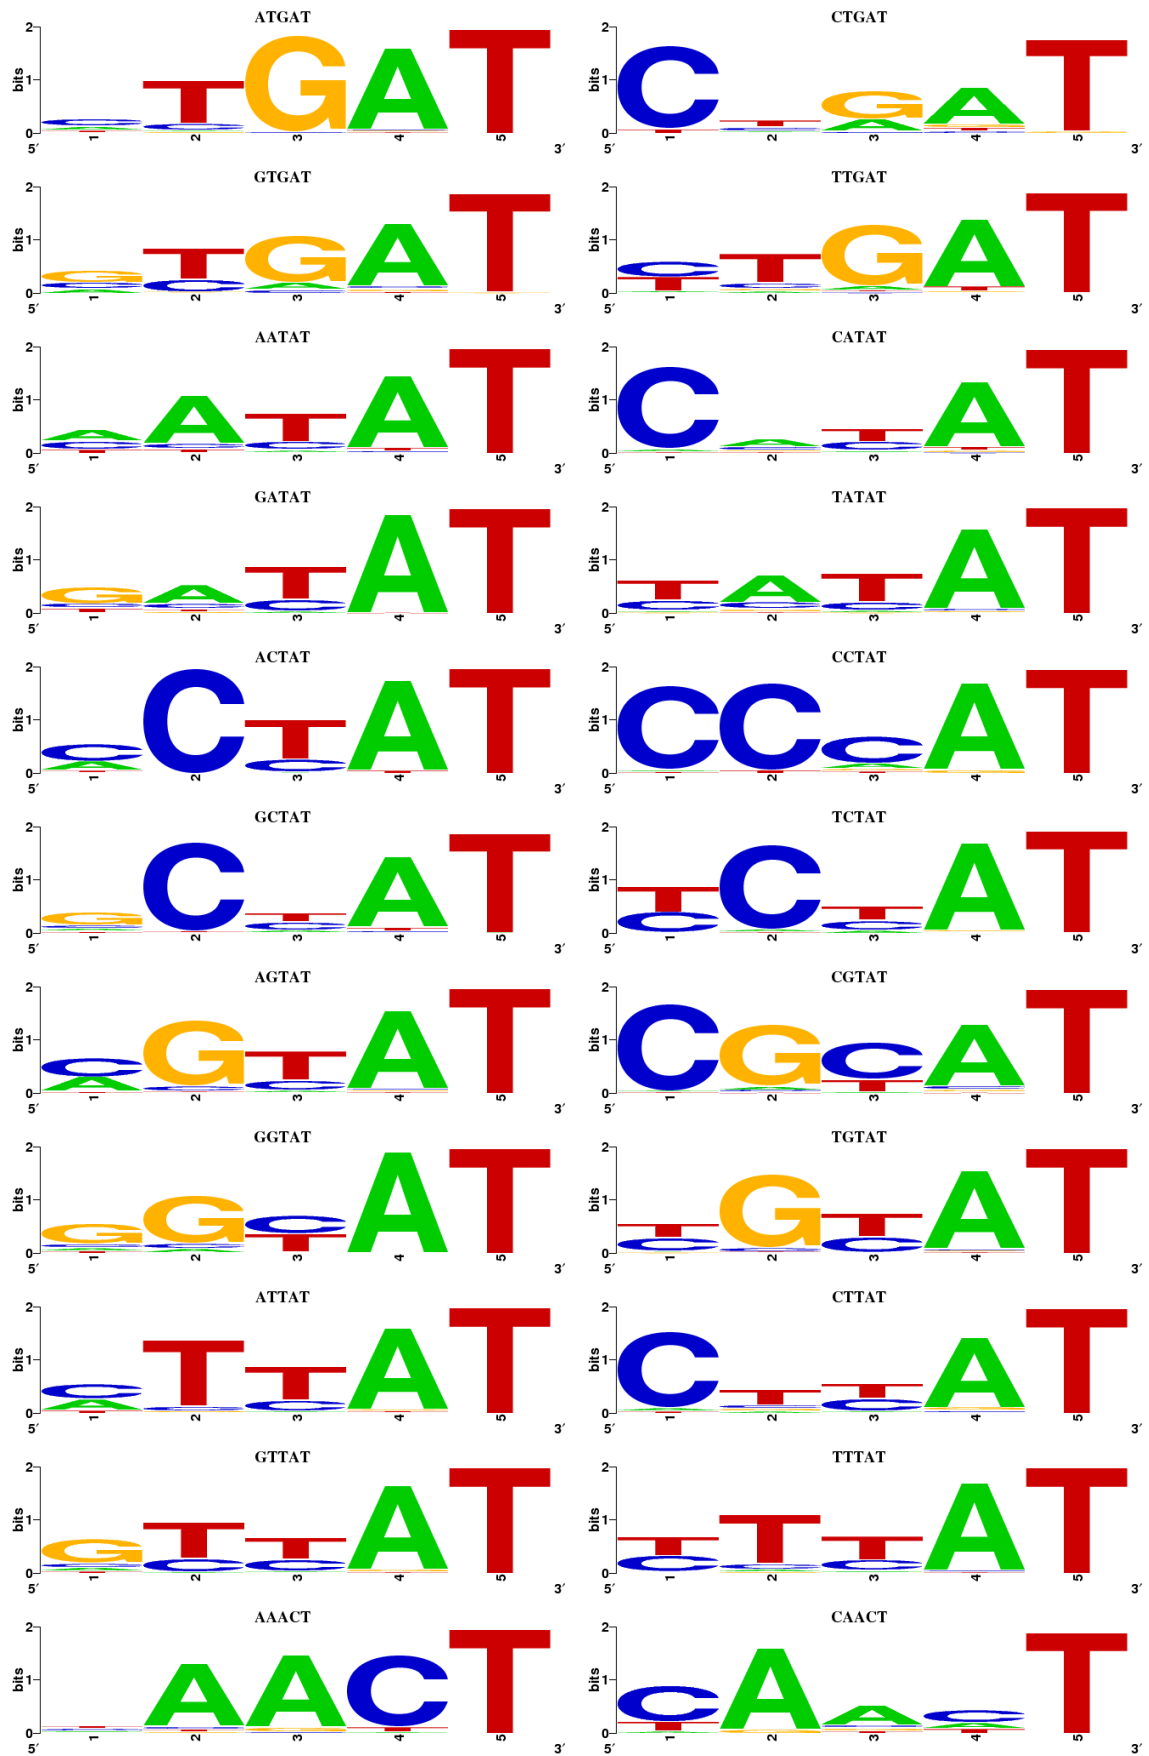

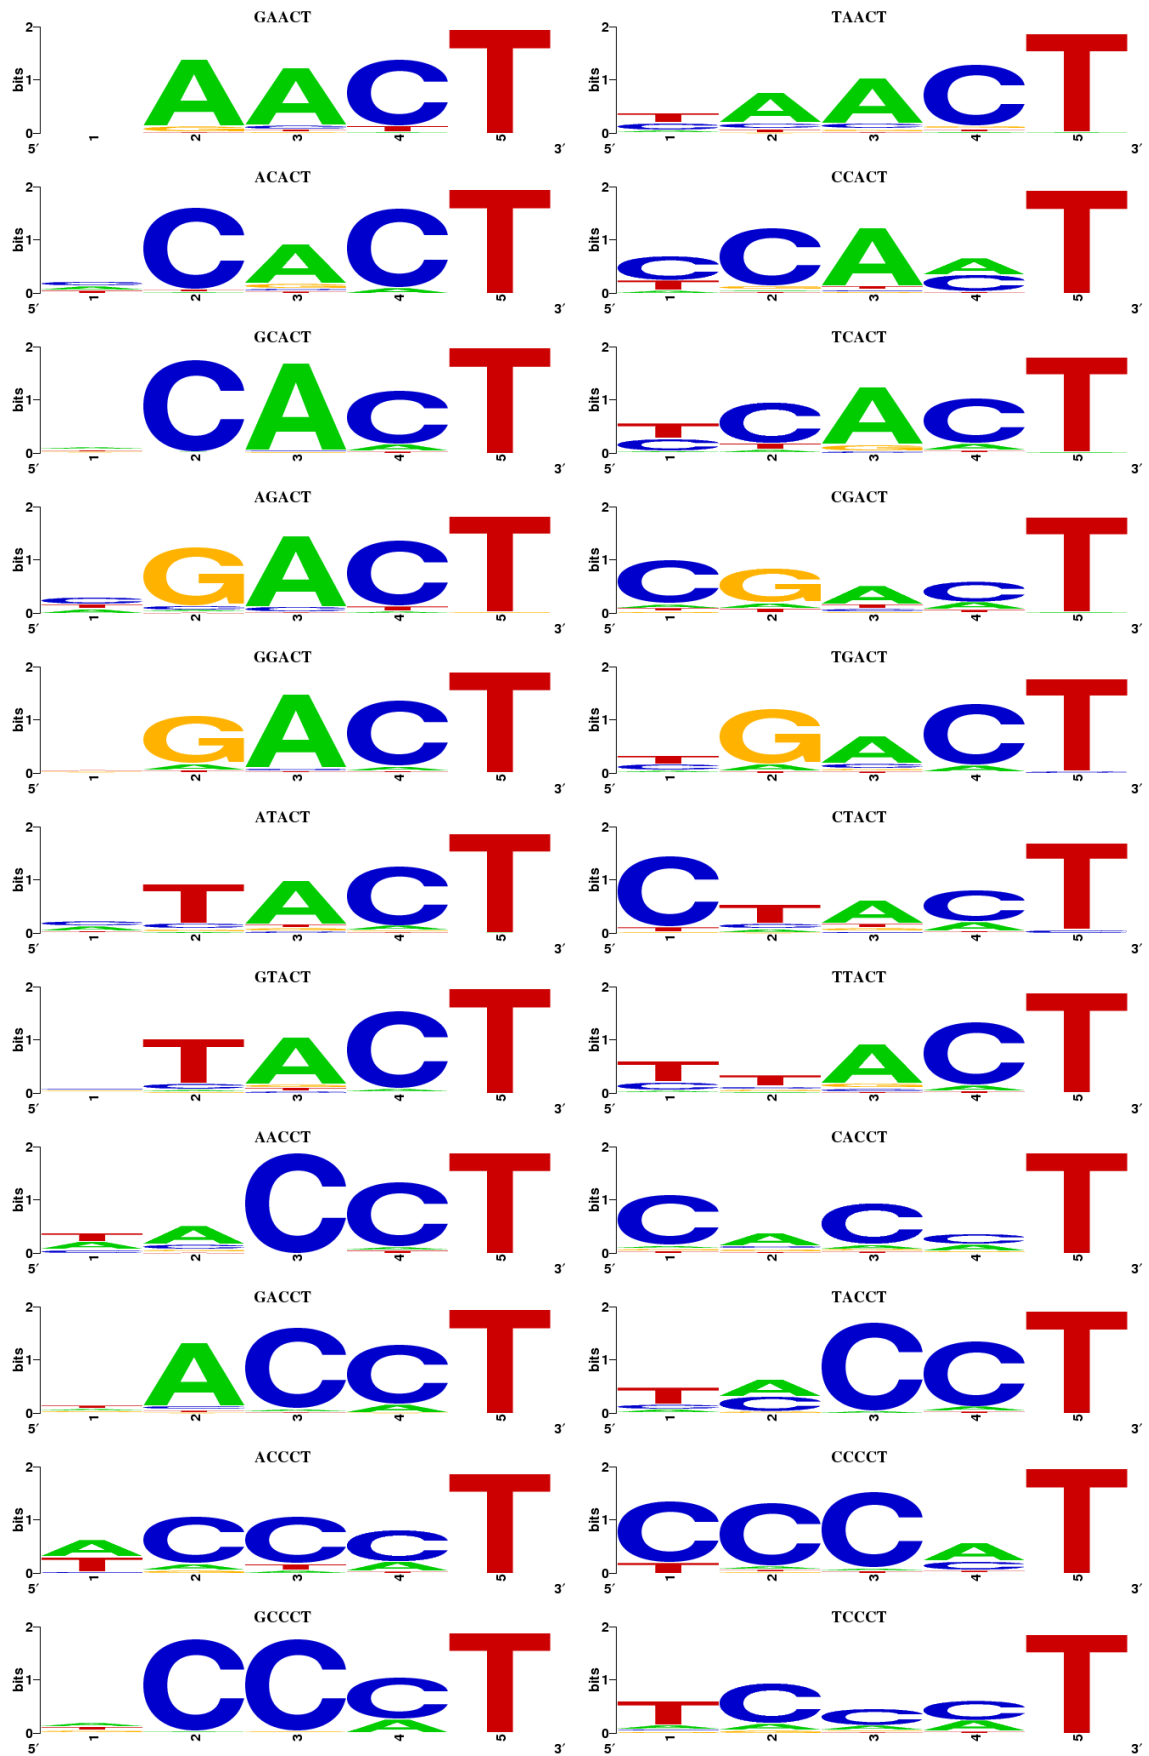

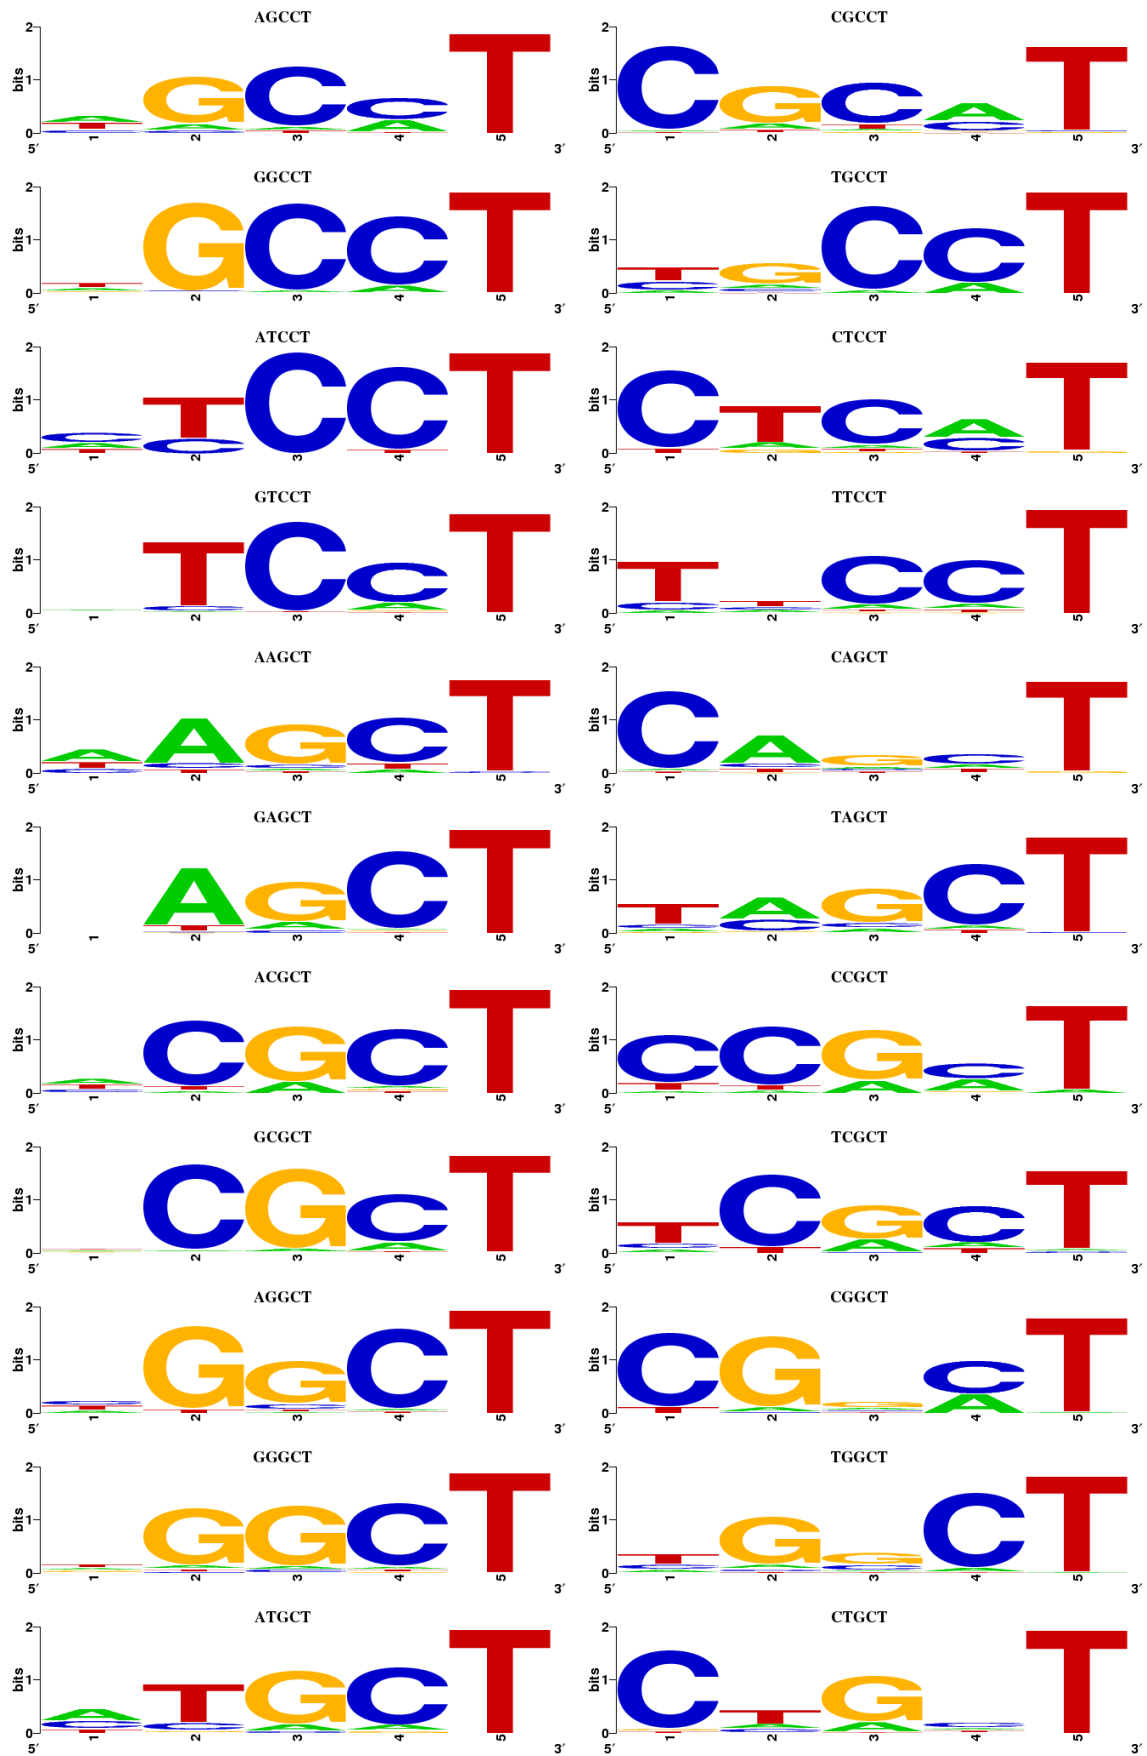

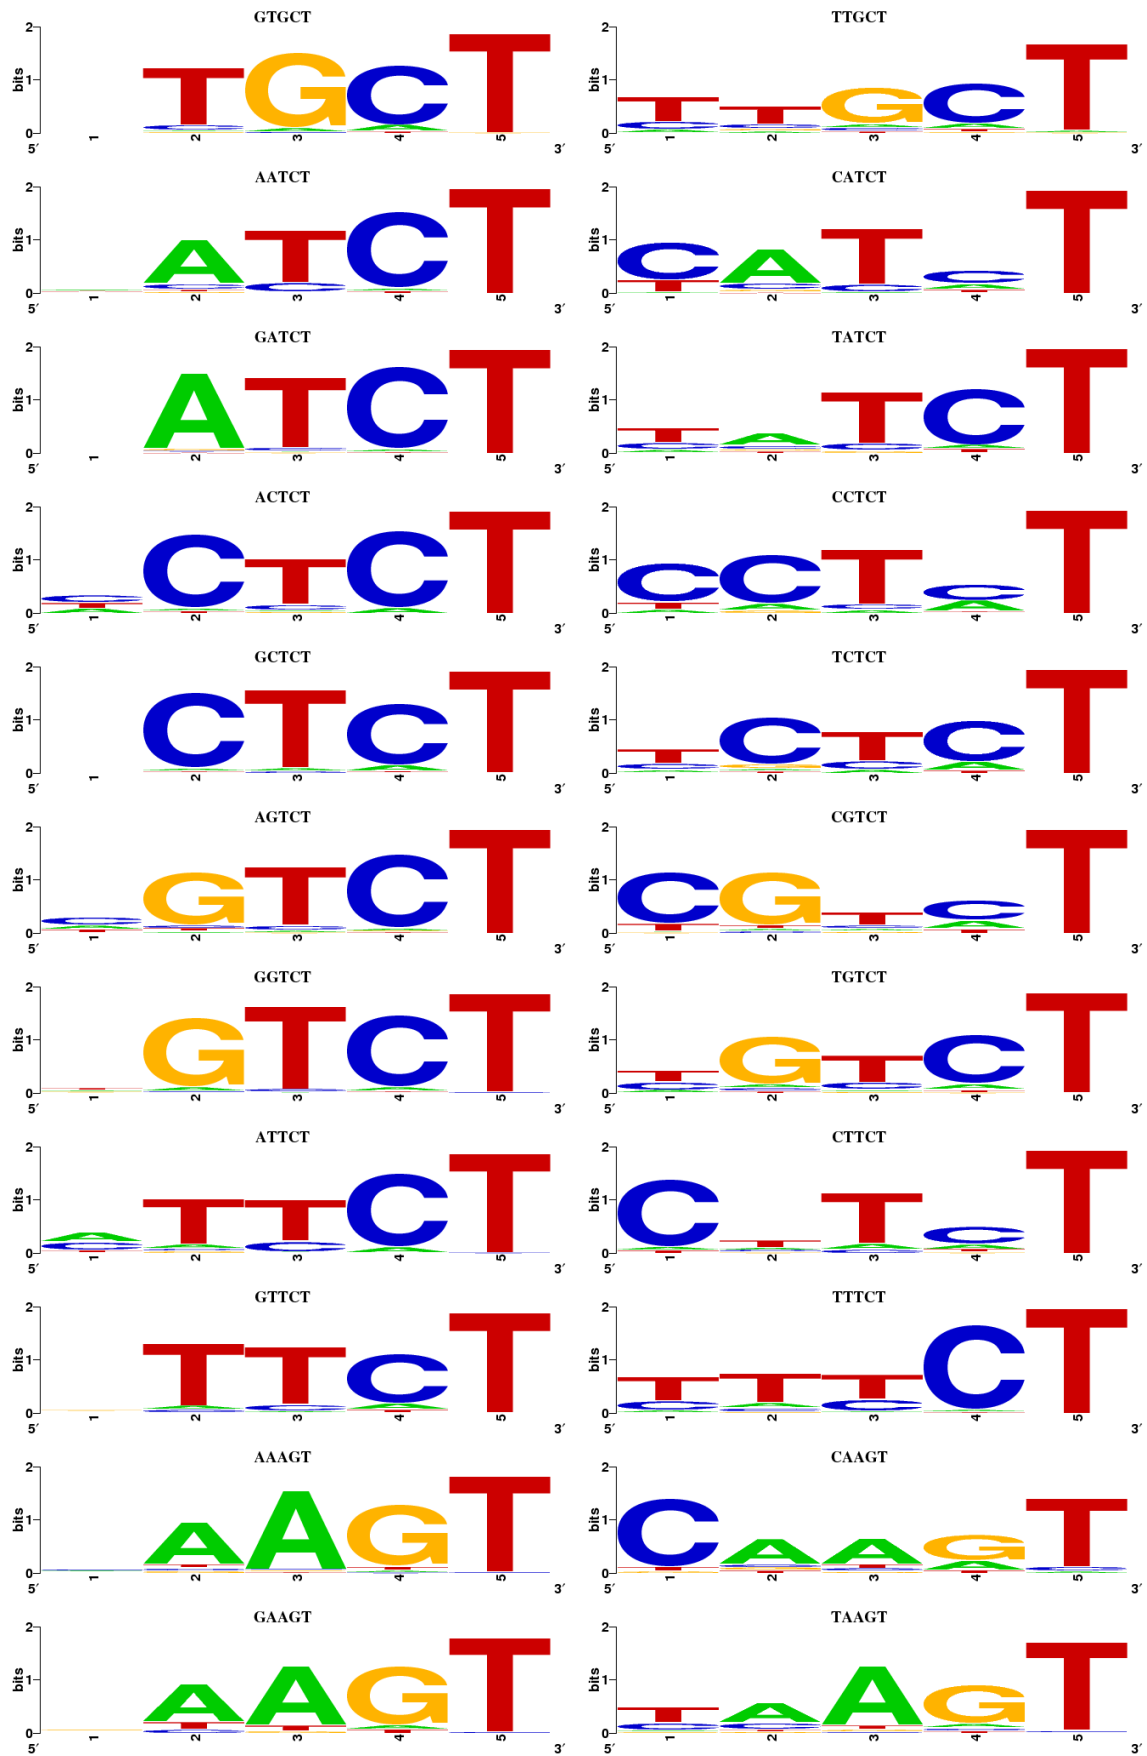

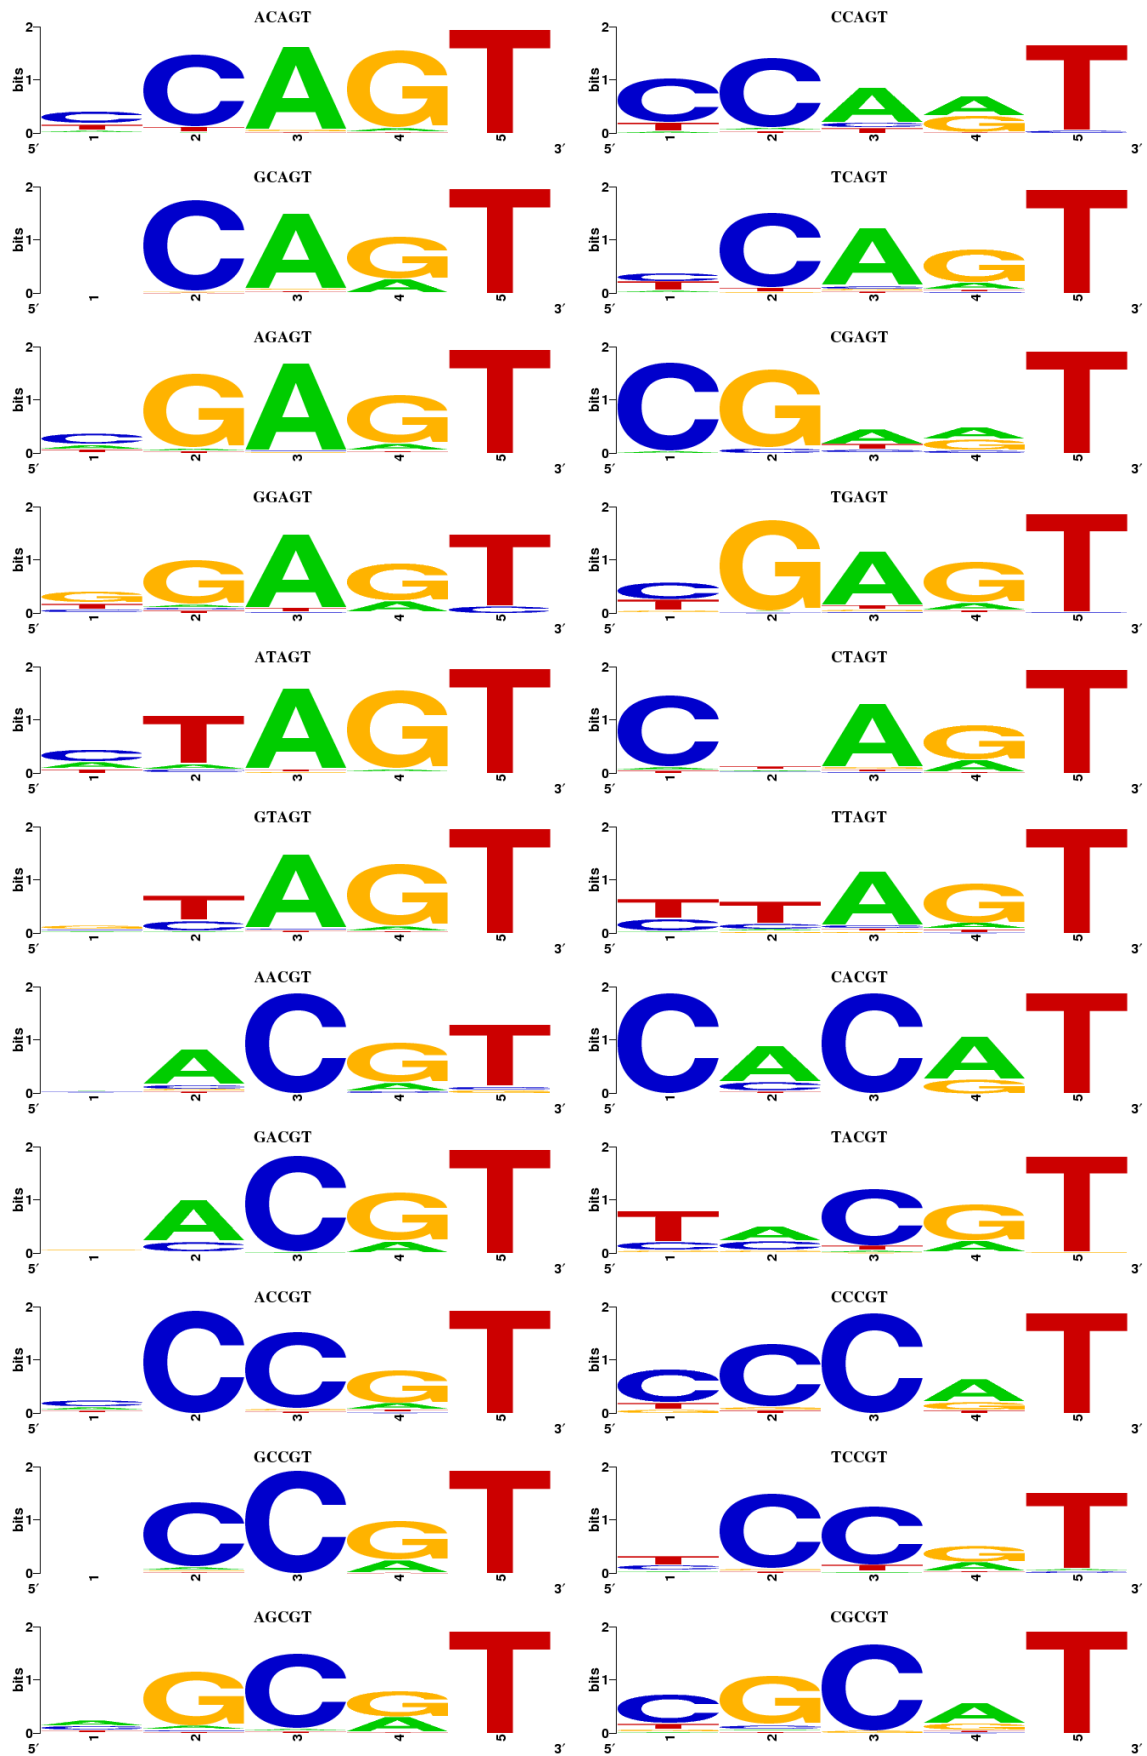

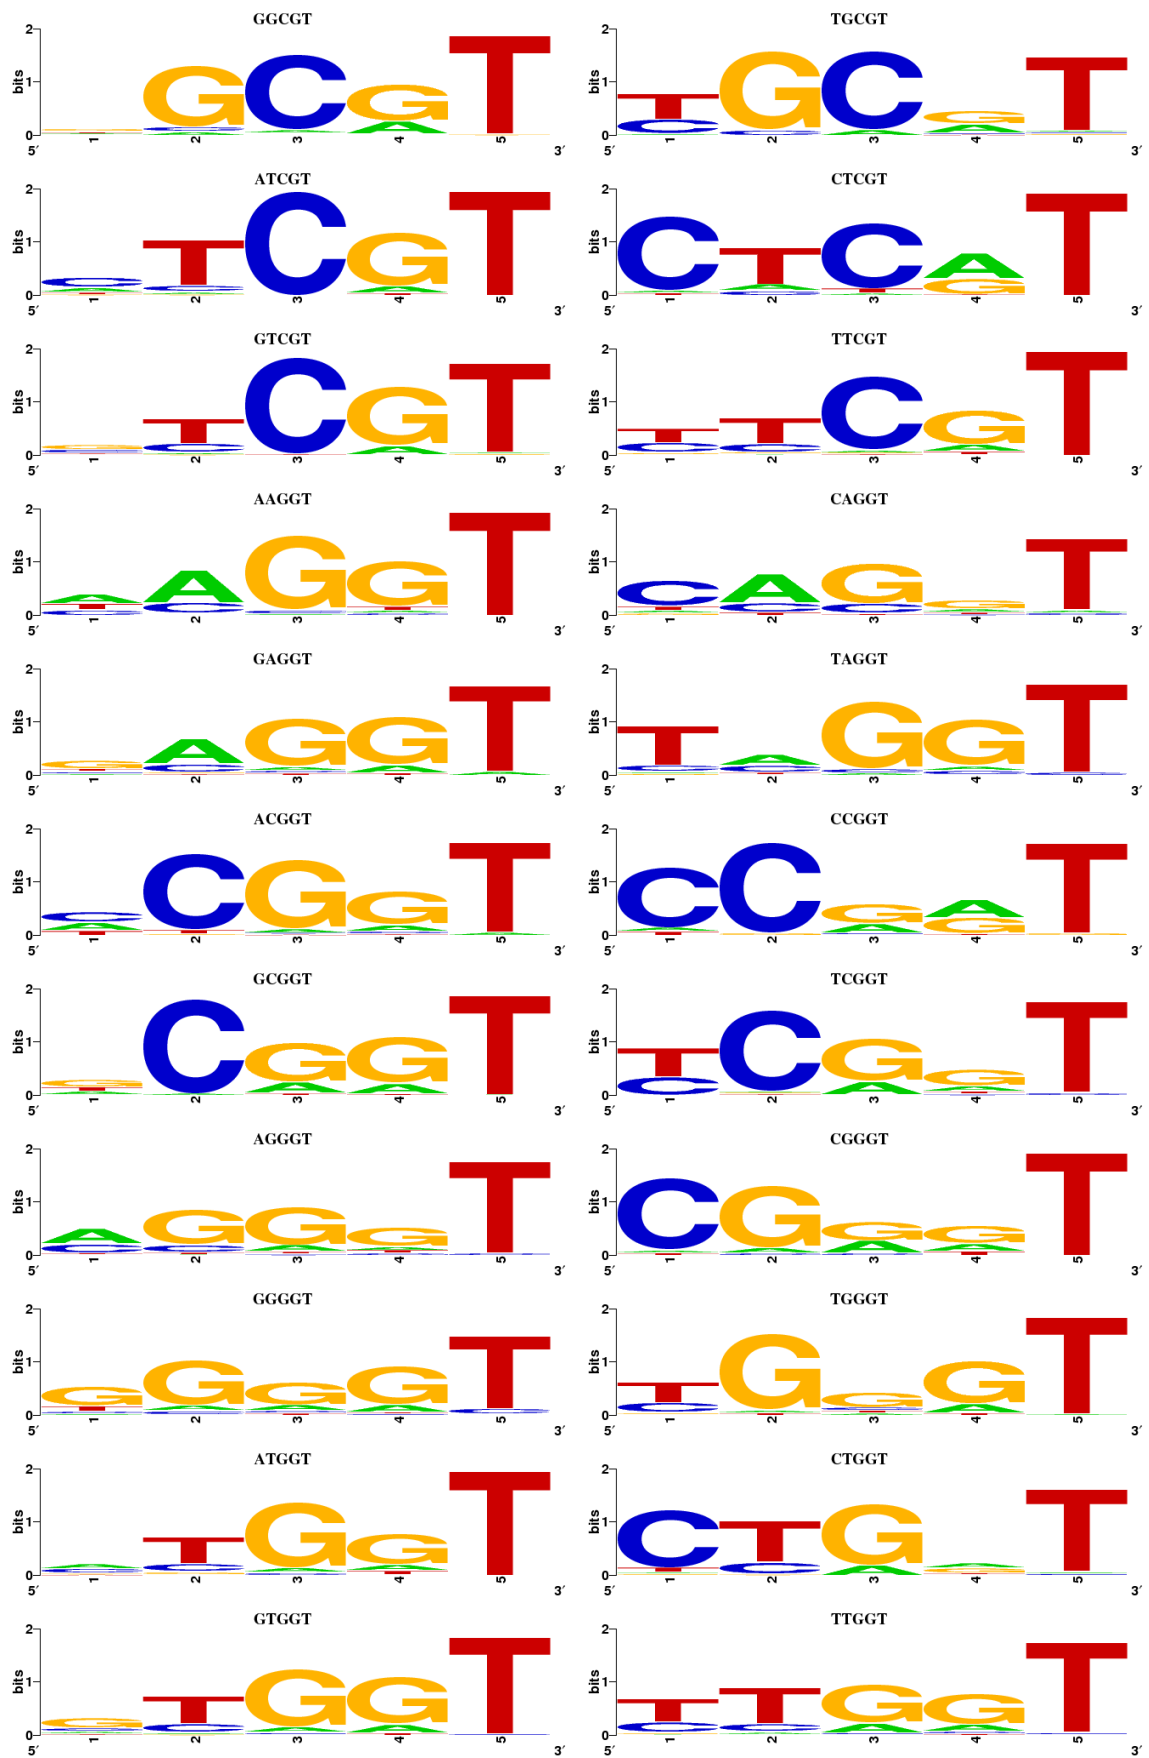

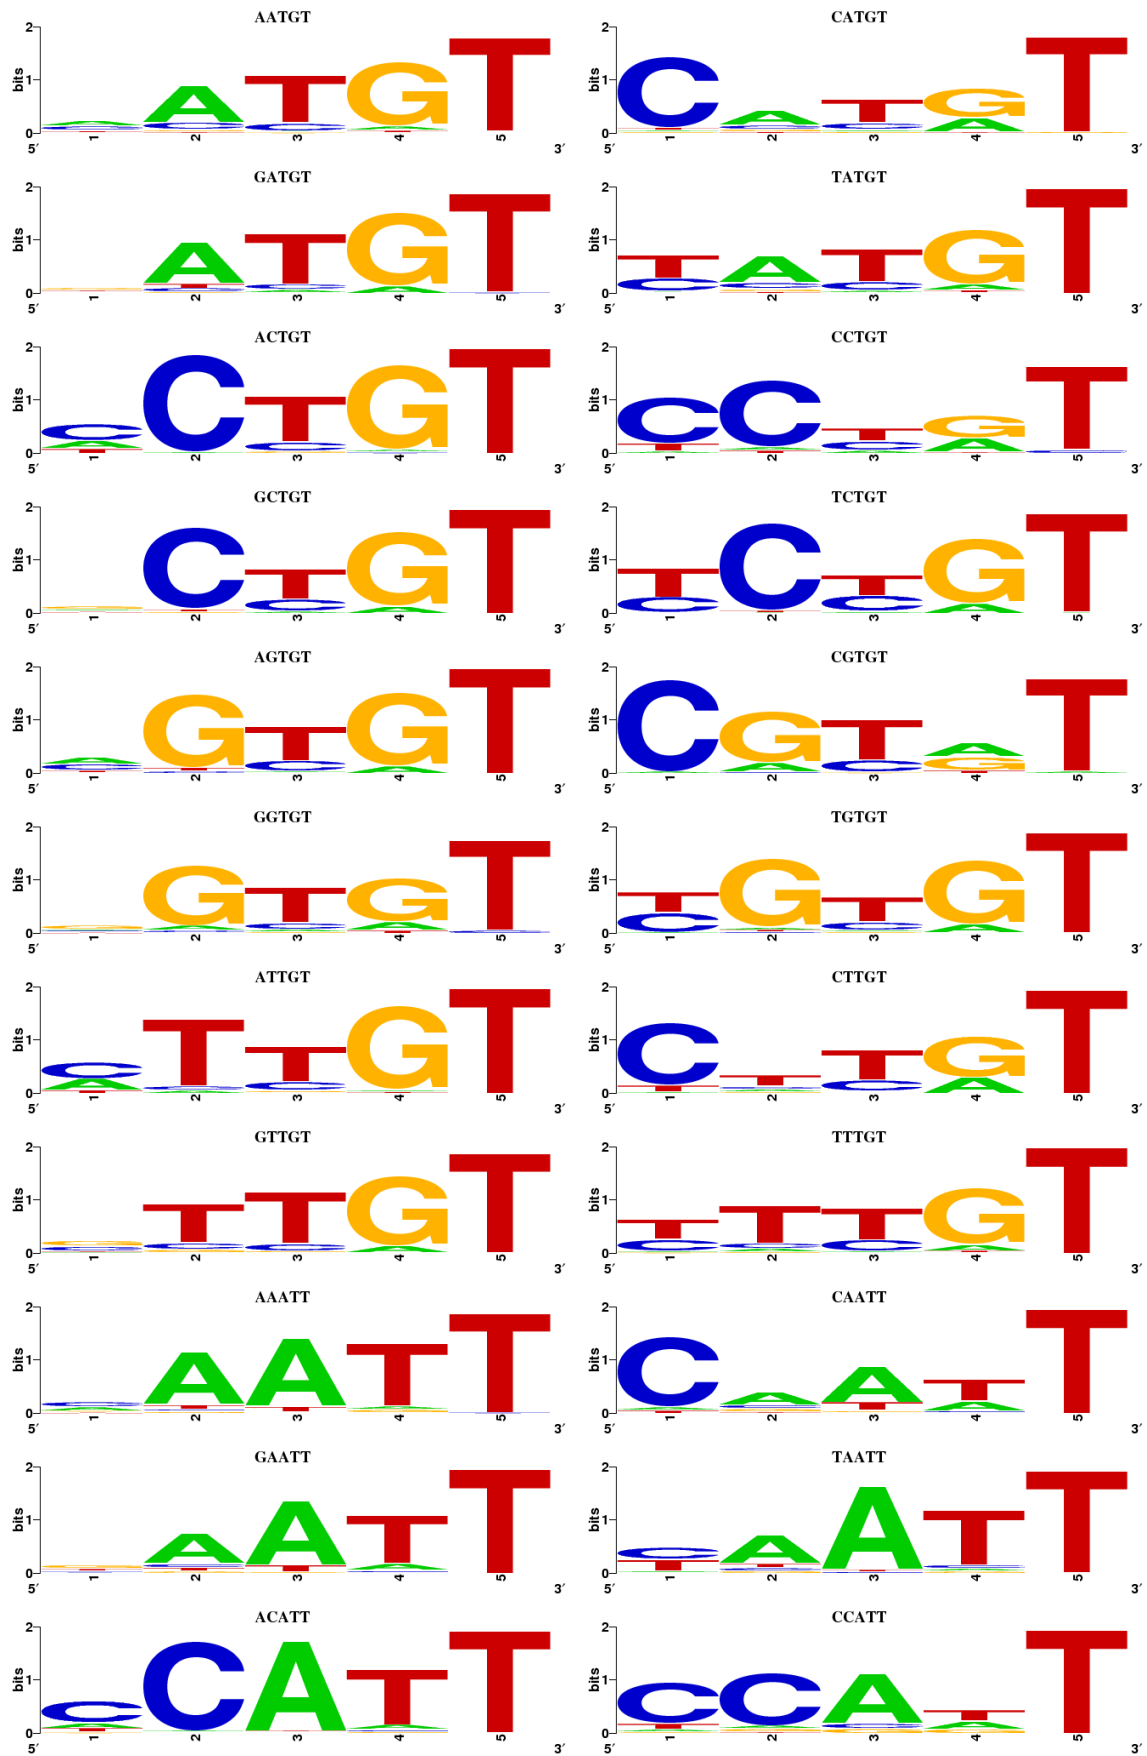



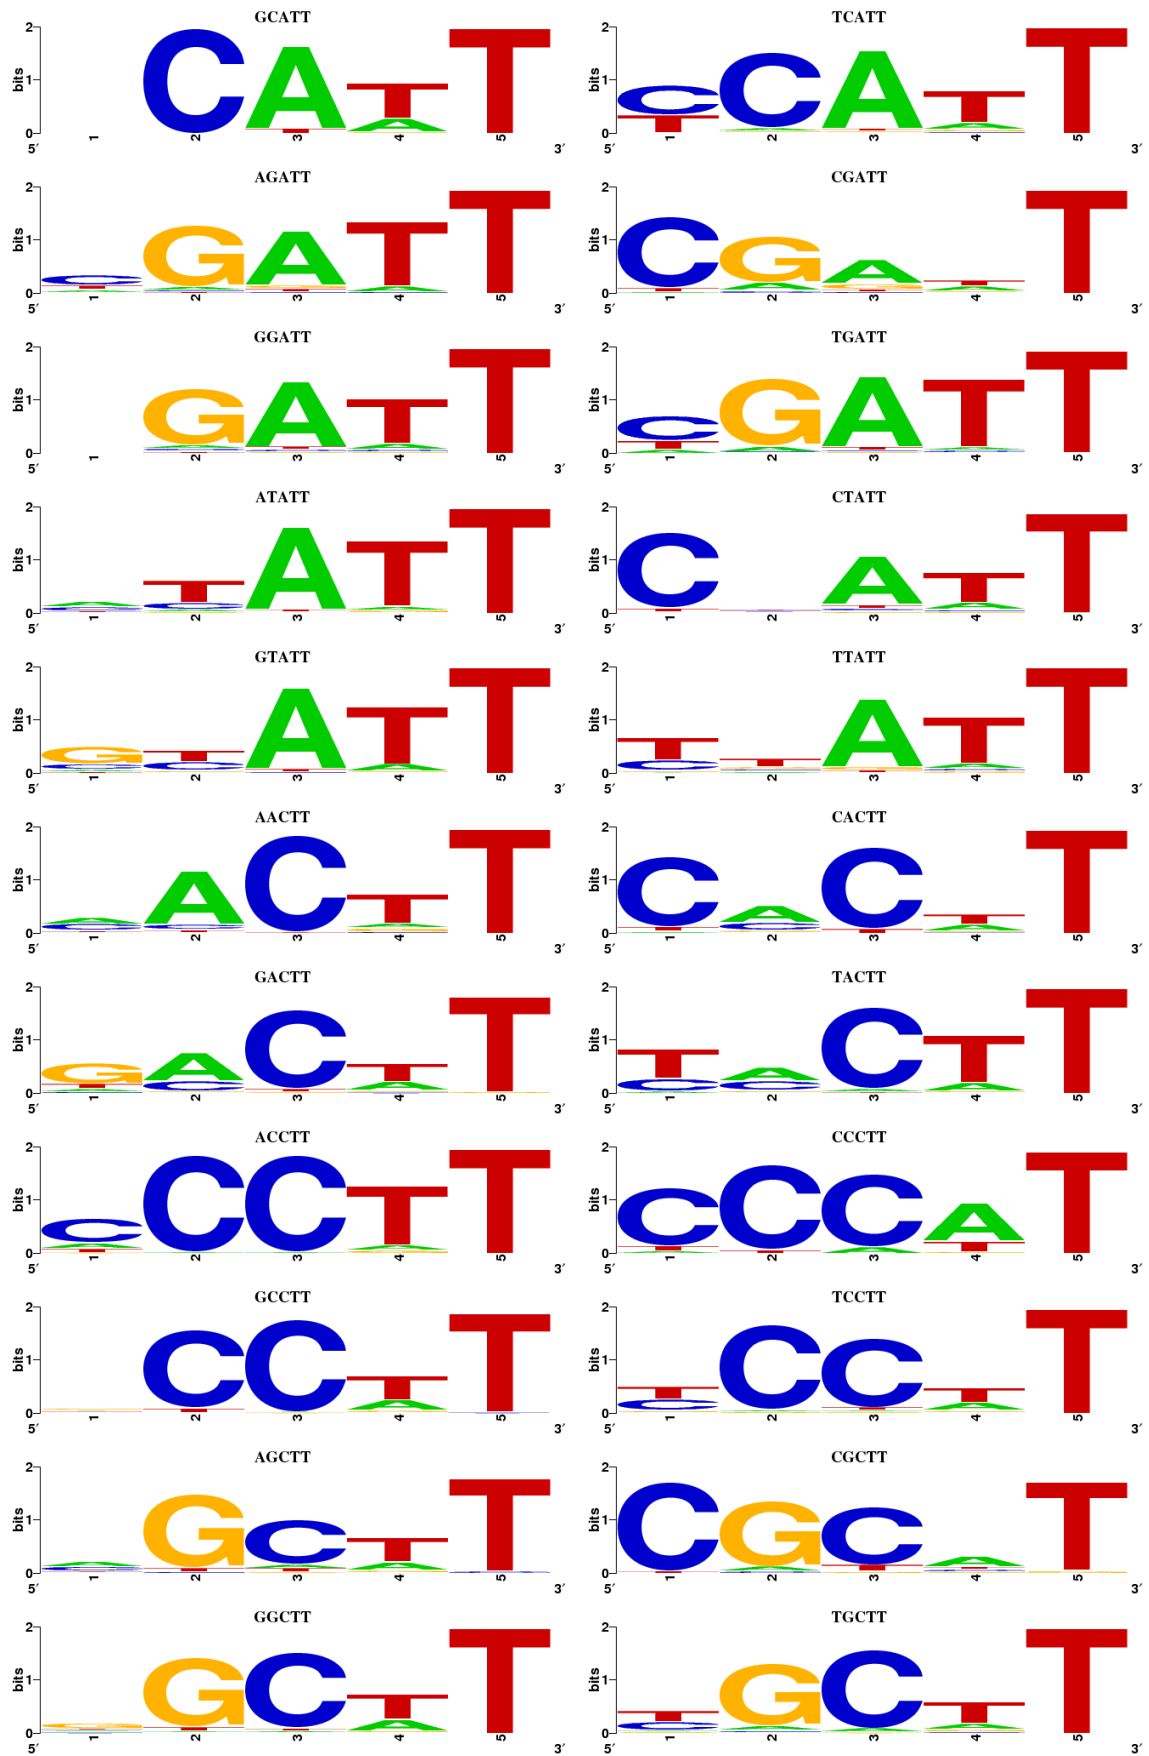

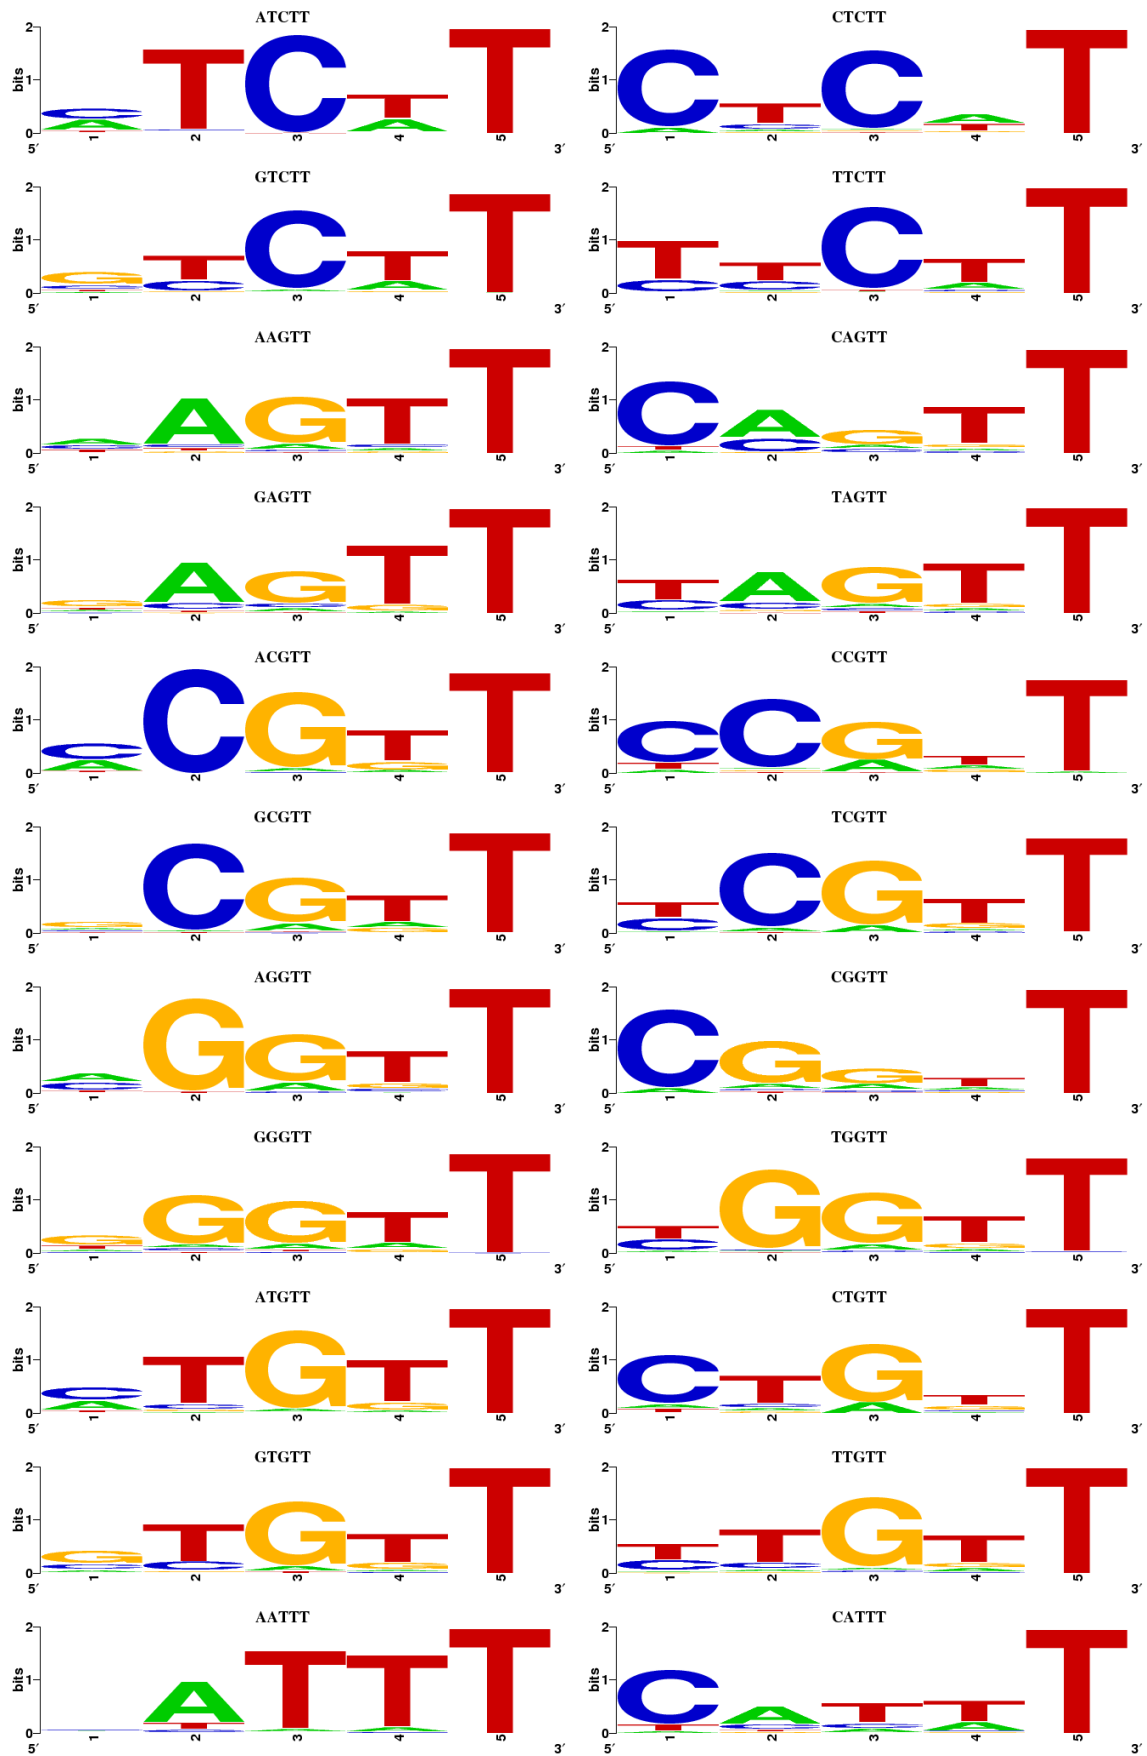

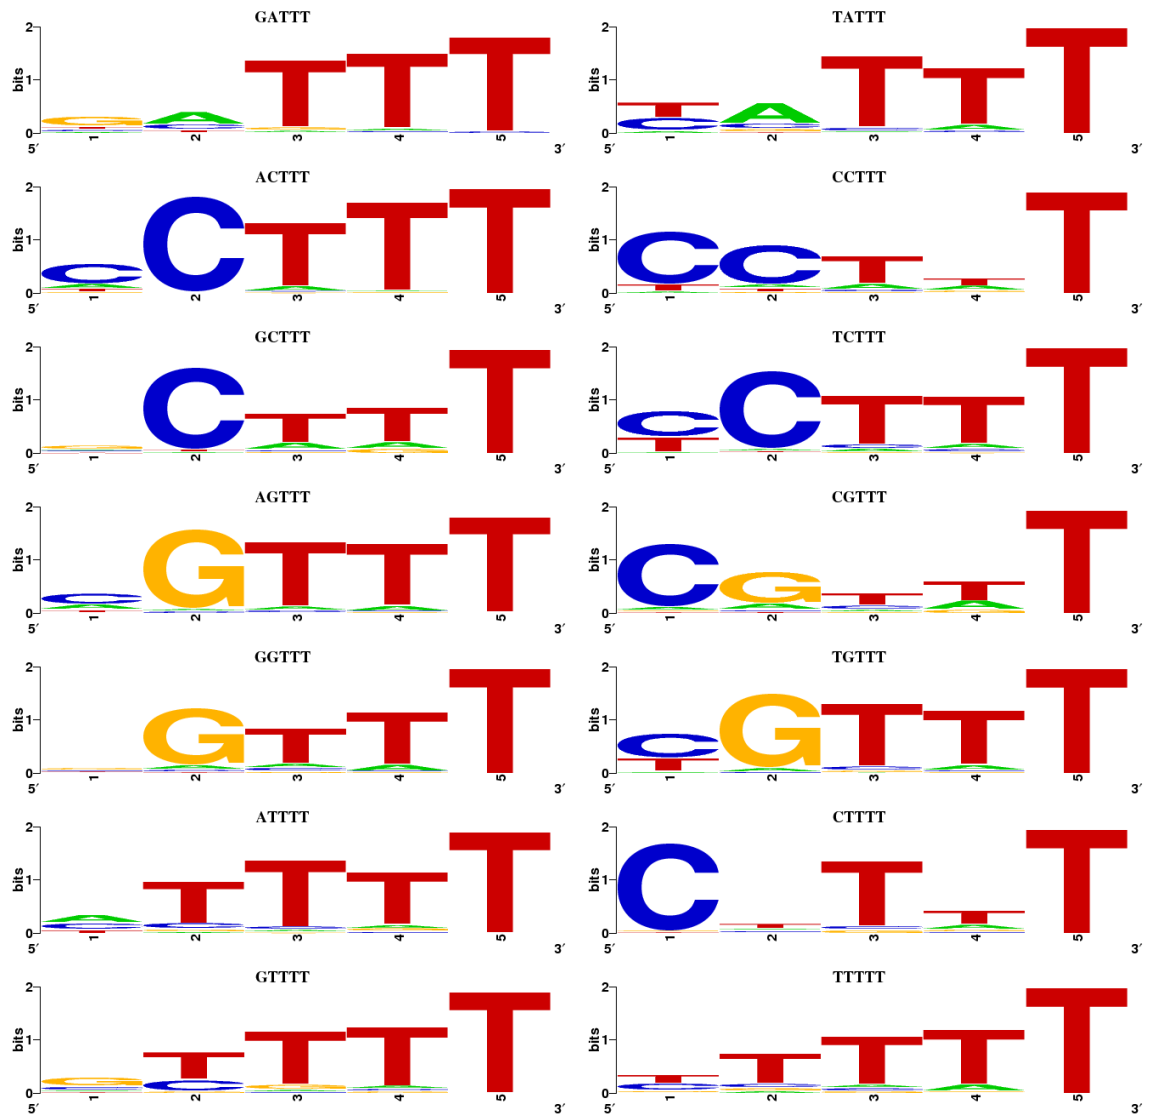

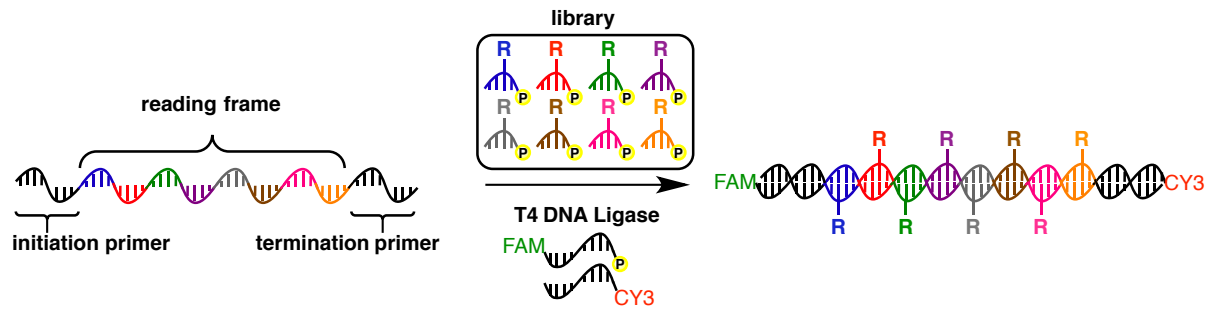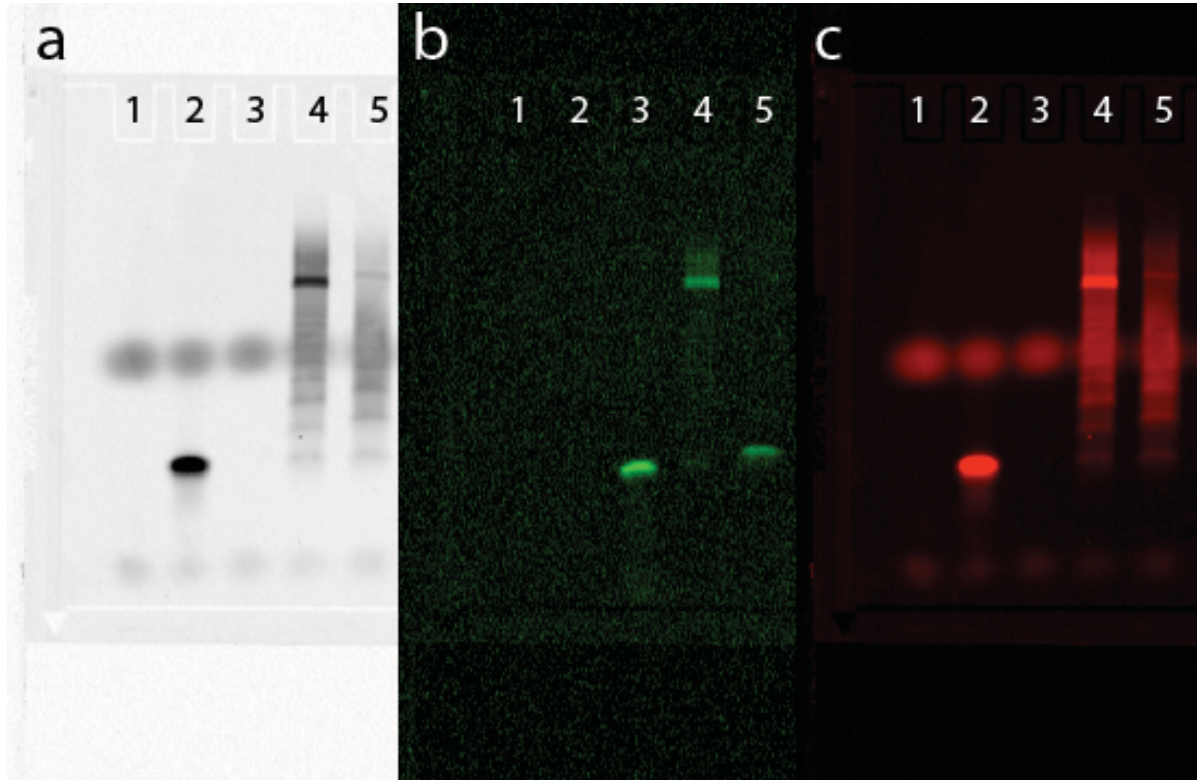

**Figure S3.** Monitoring LOOPER progression from differentially labelled primers. a) fluorescence overlay; b) FAM signal; c) CY5 signal. Lane 1: template; lane 2: CY5 primer; lane 3: FAM primer; lane 4: LOOPER with unmodified NNNAN library; lane 5: LOOPER with amine-modified NNNAN library.

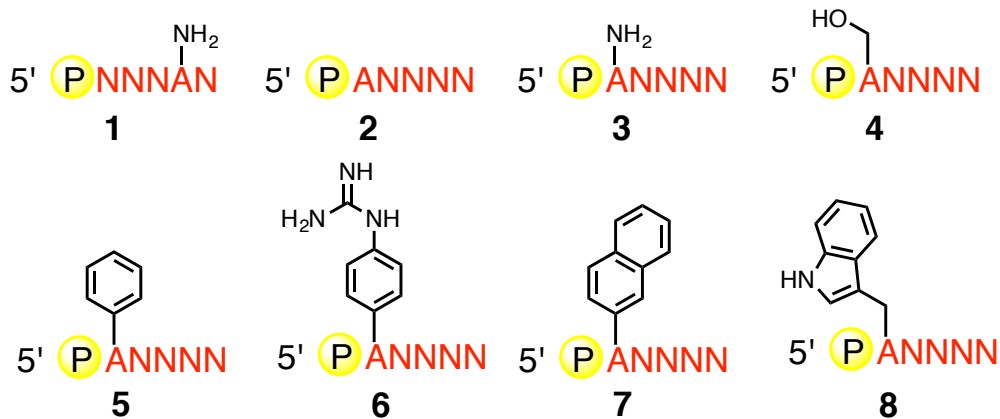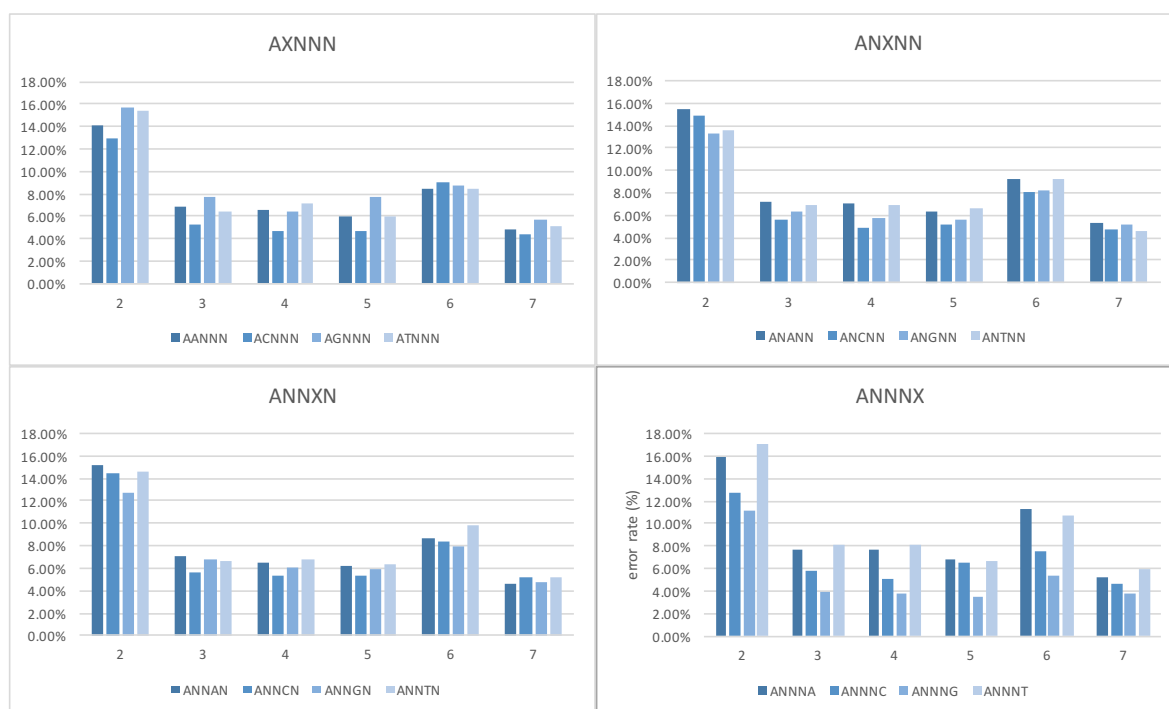

**Figure S4.** Error Rate of unmodified and modified pentanucleotide incorporation parsed by nucleotide identity at various positions.

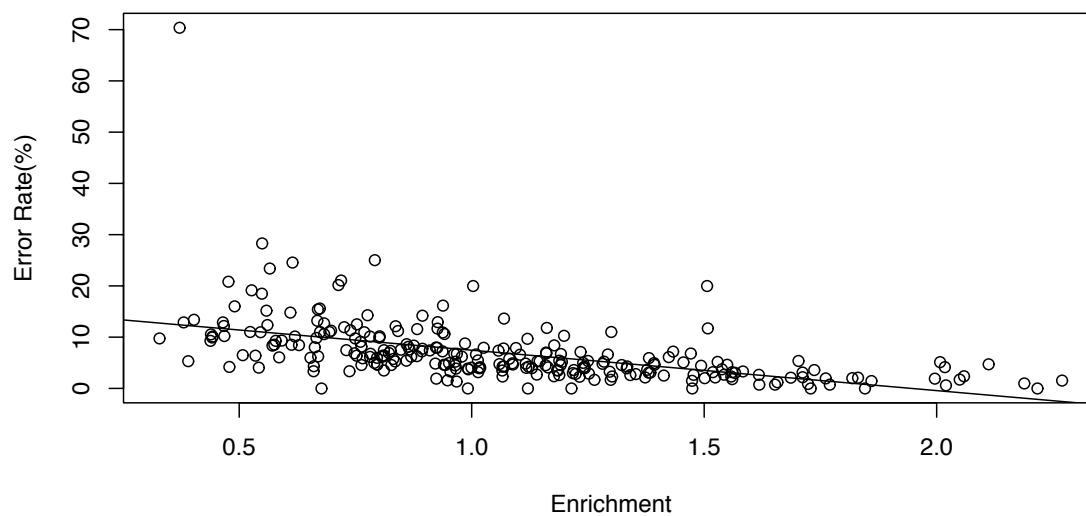

**Figure S5.** Error Rate vs Enrichment of LOOPER with a heterofunctionalized library

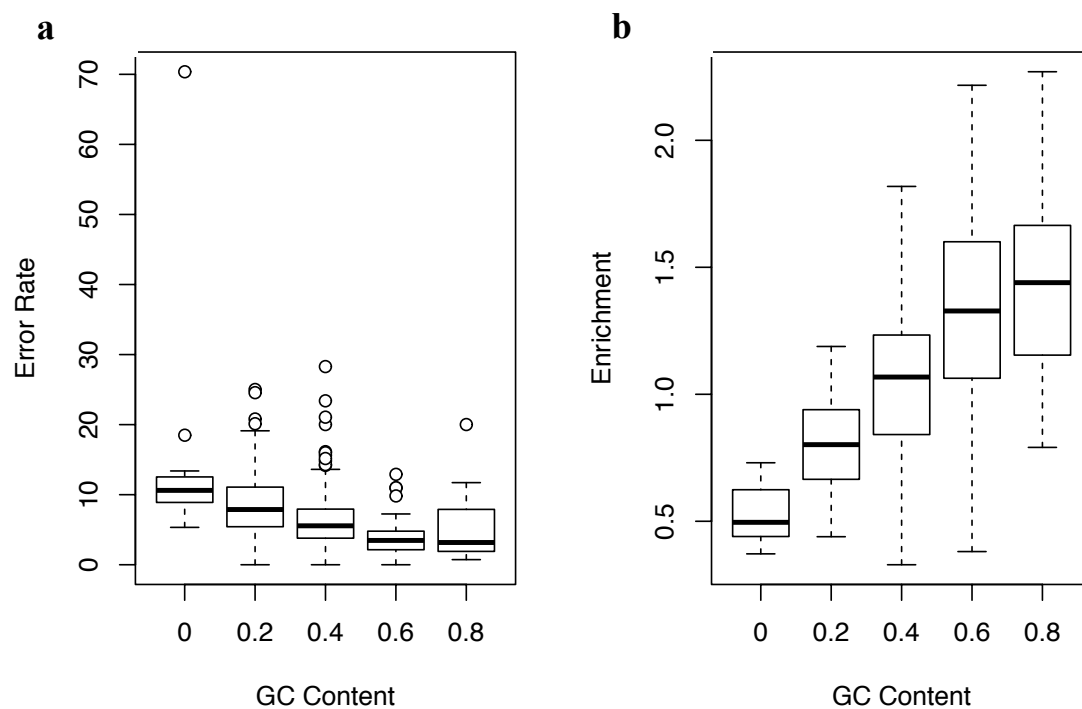

**Figure S6.** a) Error Rate vs GC Content boxplot of LOOPER with a heterofunctionalized library. b) Enrichment vs GC Content boxplot of LOOPER with a heterofunctionalized library.
